# Supplementary material for: The role of the stabilizing/leaving group in palladium catalysed cross-coupling reactions
Source: Royal Society of Chemistry journal article supplement (doi:10.1039/d4dt02533d), 2024-01-01
Supplement: d4dt02533d1.pdf [file d4dt02533d1.pdf]

Supporting Information  
for

The role of the stabilizing/leaving group in  
palladium catalysed cross-coupling  
reactions.

*Lorenzo Palio<sup>a,b</sup>, Francis Bru<sup>a</sup>, Tommaso Ruggiero<sup>a</sup>, Laurens Bourda<sup>a</sup>, Kristof Van Hecke<sup>a</sup>, Catherine S.  
J. Cazin<sup>a</sup>, Steven P. Nolan<sup>a</sup>*

Department of Chemistry, Ghent University, Ghent, Belgium

<sup>a</sup> Department of Chemistry, Center for Sustainable Chemistry, Ghent University, Krijgslaan 281 (S-3),  
9000, Ghent, Belgium.

<sup>b</sup> Univ. Lille, CNRS, Centrale Lille, ENSCL, Univ. Artois, UMR 8181 – UCCS Unité de Catalyse et Chimie  
Solide, F-59000, Lille, France.

## Table of contents

|                                                                                             |     |
|---------------------------------------------------------------------------------------------|-----|
| General consideration .....                                                                 | S3  |
| Synthesis of allyl chlorides.....                                                           | S3  |
| Synthesis of $[\text{Pd}(\eta^3\text{-R-allyl})(\mu\text{-Cl})_2]$ .....                    | S4  |
| Synthesis of $[\text{PdCl}(\eta^3\text{-R-allyl})(\text{NHC})]$ .....                       | S6  |
| Buchwald-Hartwig cross-coupling amination .....                                             | S9  |
| $[\text{Pd}'_2(\text{NHC})_2(\eta^3\text{-R-allyl})(\mu\text{-Cl})]$ dimers formation ..... | S11 |
| XRD single crystal structures .....                                                         | S16 |
| NMR-spectra.....                                                                            | S17 |
| References .....                                                                            | S39 |

## General considerations

Reagents were used as received. Solvents were dried using activated molecular sieves (3 Å) and bubbled with Ar.  $^1\text{H}$  and  $^{13}\text{C}\{-^1\text{H}\}$  Nuclear Magnetic Resonance (NMR) spectra were recorded on a Bruker ADVANCE 300 MHz or 400 MHz spectrometer. Spectra were referenced using the residual solvent peak ( $\text{C}_6\text{D}_6$ :  $\delta\text{H} = 7.16$  ppm;  $\delta\text{C} = 128.06$  ppm and  $\text{CDCl}_3$ :  $\delta\text{H} = 7.26$  ppm;  $\delta\text{C} = 77.16$  ppm) at 298 K.

## Synthesis of allyl chlorides

### General Procedure

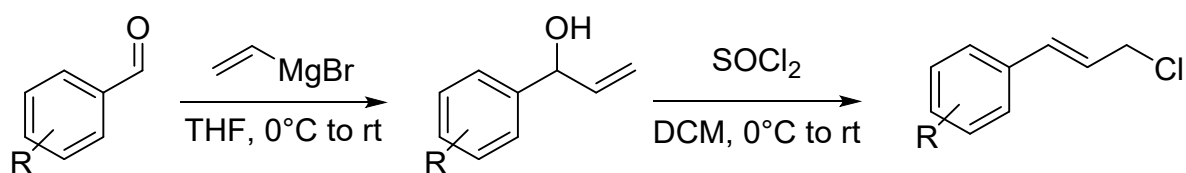

Scheme S1: Synthesis of the allyl chlorides

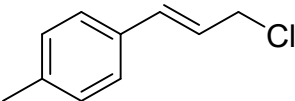 **p-tol-allyl chloride (1)** was synthesized using the general procedure from toluanaldehyde (1 mL, 8.5 mmol), vinylmagnesiumbromide (1.0 M in THF; 10.2 mL, 10.2 mmol) and  $\text{SOCl}_2$  (2.5 mL, 34 mmol). Purification by vacuum distillation (100°C at 0.7 torr). Isolated as a pale yellow oil; yield: 4.61 mmol (54 %).  $^1\text{H-NMR}$  (400 MHz,  $\text{CDCl}_3$ , 298 K)  $\delta = 2.35$  (s, 3H), 4.25 (dd, 2H); 6.27 (dt, 1H), 6.63 (d, 1H), 7.14 (d, 2H); 7.29 (d, 2H). The data are in accordance with the literature<sup>1</sup>.

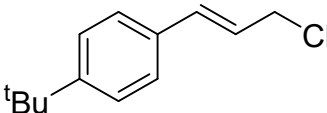 **p-tBu-cinnamyl chloride (2)** was synthesized using the general procedure from t-butylbenzaldehyde (2 mL, 12 mmol), vinylmagnesiumbromide (1.0 M in THF; 14.4 mL, 14.4 mmol) and  $\text{SOCl}_2$  (3.5 mL, 48 mmol). Purification by vacuum distillation (120°C at 0.7 torr). Isolated as a pale yellow oil; yield: 7.8 mmol (65 %).  $^1\text{H-NMR}$  (300 MHz,  $\text{CDCl}_3$ , 298 K)  $\delta = 1.33$  (s, 9H), 4.25 (dd, 2H); 6.29 (dt, 1H), 6.65 (d, 1H), 7.36 (d, 4H). The data are in accordance with the literature<sup>2</sup>.

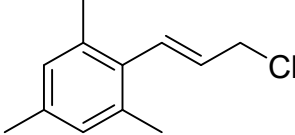 **2,4,6-trimethylcinnamyl chloride (3)** was synthesized using the general procedure from mesitaldehyde (2 mL, 13.6 mmol), vinylmagnesiumbromide (1.0 M in THF; 16.4 mL, 16.4 mmol) and  $\text{SOCl}_2$  (4 mL, 54.4 mmol). Purification by vacuum distillation (120°C at 0.7 torr). Isolated as a pale yellow oil; yield: 8.6 mmol (64 %).  $^1\text{H-NMR}$  (300 MHz,  $\text{CDCl}_3$ , 298 K)  $\delta = 2.41$  (s, 9H), 4.36 (dd, 2H); 5.96 (dt, 1H), 6.76 (d, 1H), 7.00 (s, 2H). The data are in accordance with the literature<sup>3</sup>.

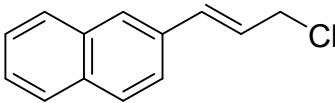 **2-(3-chloro-1-propen-1-yl)-naphthalene (4)** was synthesized using the general procedure from  $\beta$ -naphthalenaldehyde (0.9934 g, 6.4 mmol), vinylmagnesiumbromide (1.0 M in THF; 7.6 mL, 7.6 mmol) and  $\text{SOCl}_2$  (0.5 mL, 6.36 mmol). Purification by recrystallization with pentane. Isolated as a off-white powder; yield: 4.1 mmol (64%).  $^1\text{H-NMR}$  (400 MHz,  $\text{CDCl}_3$ , 298 K)  $\delta = 4.31$  (dd, 2H), 6.47 (dt, 1H); 6.82 (m, 1H), (m, 7.48, 2H), 7.60 (dd, 1H), 7.76 (m, 1H), 7.81 (m, 3H). The data are in accordance with the literature<sup>4</sup>.

## Synthesis of $[\text{Pd}(\eta^3\text{-R-allyl})(\mu\text{-Cl})]_2$

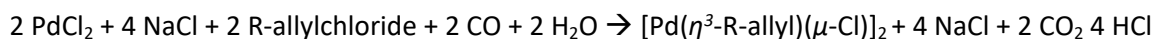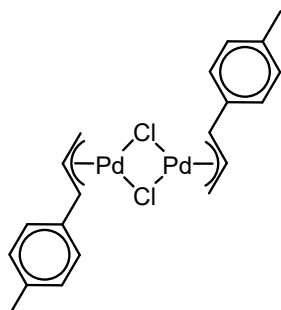

**$[\text{Pd}(\eta^3\text{-p-tol-allyl})(\mu\text{-Cl})]_2$  (5)** was synthesized using the general procedure from p-tol-allyl chloride (500 mg; 3.0 mmol),  $\text{PdCl}_2$  (532 mg, 3.0 mmol) and NaCl (351 mg, 6 mmol). Isolated as a pale yellow solid; yield: 0.69 mmol (46 %).  $^1\text{H-NMR}$  (400 MHz,  $\text{CDCl}_3$ , 298 K)  $\delta$  = 2.21 (s, 6 H,  $\text{CH}_3$ ), 3.00 (d, 2H,  $J$  = 11.9 Hz, CH allyl), 3.93 (d, 2H,  $J$  = 6.7 Hz, CH allyl), 4.64 (d, 2H,  $J$  = 11.9 Hz, CH allyl), 5.77 (dt, 2H,  $J$  = 6.8 Hz, CH allyl), 7.07 (d, 4H,  $J$  = 11.9 Hz, CH phenyl), 7.39 (d, 4H,  $J$  = 11.9 Hz, CH phenyl).  $^{13}\text{C}\{-\text{H}\}\text{-NMR}$  (400 MHz,  $\text{CDCl}_3$ , 298 K)  $\delta$  = 138.6, 134.0, 129.9, 127.9, 105.4, 82.4, 59.1, 21.6. Elemental Analysis: calcd for  $\text{C}_{20}\text{H}_{24}\text{Cl}_2\text{Pd}_2$ : C, 43.99; H, 4.06; Found: C, 43.88; H, 3.96

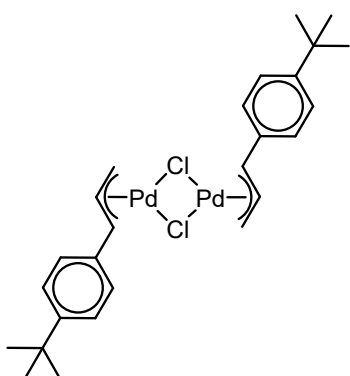

**$\text{Pd}(\eta^3\text{-p-t-Bu-cin})(\mu\text{-Cl})]_2$  (6)** was synthesized using the general procedure from p-<sup>t</sup>butylcinnamyl chloride (500 mg; 2.4 mmol),  $\text{PdCl}_2$  (426 mg, 2.4 mmol) and NaCl (281mg, 4.8 mmol). Isolated as a pale yellow solid; yield: 0.63 mmol (52 %).  $^1\text{H-NMR}$  (300 MHz,  $\text{CDCl}_3$ , 298 K)  $\delta$  = 1.28 (s, 18 H,  $\text{CH}_3$ ), 3.01 (d, 2H,  $J$  = 12.5 Hz, CH allyl), 3.94 (d, 2H,  $J$  = 6.4 Hz, CH allyl), 4.66 (d, 2H,  $J$  = 11.5 Hz, CH allyl), 5.76 (dt, 2H,  $J$  = 6.7 Hz, CH allyl), 7.28 (d, 4H,  $J$  = 8.3 Hz, CH phenyl), 7.44 (d, 4H,  $J$  = 8.3 Hz, CH phenyl).  $^{13}\text{C}\{-\text{H}\}\text{-NMR}$  (400 MHz,  $\text{CDCl}_3$ , 298 K)  $\delta$  = 151.6, 134.1, 127.8, 126.1, 105.6, 82.3, 59.1, 31.0. Elemental Analysis: calcd for  $\text{C}_{26}\text{H}_{36}\text{Cl}_2\text{Pd}_2$ : C, 49.55; H, 5.44; Found: C, 49.4, H, 5.36.

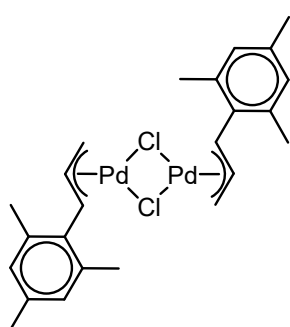

**$\text{Pd}(\eta^3\text{-mes-allyl})(\mu\text{-Cl})]_2$  (7)** was synthesized using the general procedure from 2,4,6-trimethylcinnamyl chloride (500 mg; 2.57 mmol),  $\text{PdCl}_2$  (456 mg, 2.57 mmol) and NaCl (300 mg, 5.14 mmol). Isolated as a pale yellow solid; yield: 0.66 mmol (51 %).  $^1\text{H-NMR}$  (300 MHz,  $\text{CDCl}_3$ , 298 K)  $\delta$  = 2.13 (s, 6 H, p- $\text{CH}_3$ ), 2.48 (s, 12 H, o- $\text{CH}_3$ ), 2.94 (d, 2H,  $J$  = 11.6 Hz, CH allyl), 3.87 (d, 2H,  $J$  = 6.5 Hz, CH allyl), 4.83 (d, 2H,  $J$  = 12.1 Hz, CH allyl), 5.67 (dt, 2H,  $J$  = 6.6 Hz, CH allyl), 6.78 (s, 4H, CH phenyl).  $^{13}\text{C}\{-\text{H}\}\text{-NMR}$  (400 MHz,  $\text{CDCl}_3$ , 298 K)  $\delta$  = 138.0, 137.5, 130.7, 130.2, 107.4, 81.0, 58.2, 22.6, 21.2. Elemental Analysis: calcd for  $\text{C}_{24}\text{H}_{32}\text{Cl}_2\text{Pd}_2$ : C, 47.86; H, 5.02; Found: C, 48.10; H, 4.95.

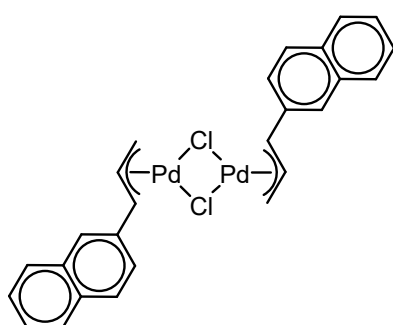

**$\text{Pd}(\eta^3\text{-2-naph-allyl})(\mu\text{-Cl})]_2$  (8)** was synthesized using the general procedure from 2-(3-chloro-1-propen-1-yl)-naphthalene (500 mg; 2.47 mmol),  $\text{PdCl}_2$  (438 mg, 2.47 mmol) and NaCl (289 mg, 4.94 mmol). Isolated as a pale yellow solid; yield: 0.59 mmol (48 %).  $^1\text{H-NMR}$  (300 MHz,  $\text{CDCl}_3$ , 298 K)  $\delta$  = 3.08 (d, 2H,  $J$  = 11.9 Hz, CH allyl), 4.00 (d, 2H,  $J$  = 6.2 Hz, CH allyl), 4.77 (d, 2H,  $J$  = 11.4 Hz, CH allyl),

5.90 (dt, 2H,  $J = 6.7$  Hz, CH allyl), 7.39-7.57 (m, 6H, CH naph), 7.67-7.90 (m, 8H, CH naph).  $^{13}\text{C}$ -{H}-NMR (400 MHz, DMSO- $d_6$ , 298 K)  $\delta = 135.3, 133.7, 133.1, 128.6, 128.3, 128.2, 127.1, 126.9, 125.8, 113.7, 87.9, 65.0, 55.1$ . Elemental Analysis: calcd for  $\text{C}_{26}\text{H}_{24}\text{Cl}_2\text{Pd}_2$ : C, 50.52; H, 3.59; Found: C: 50.42; H: 3.47

## Synthesis of $[(\text{NHC})\text{Pd}(\eta^3\text{-R-allyl})\text{Cl}]$

For the synthesis of the Pd-precatalysts, two procedures are possible:

### Weak-base route:

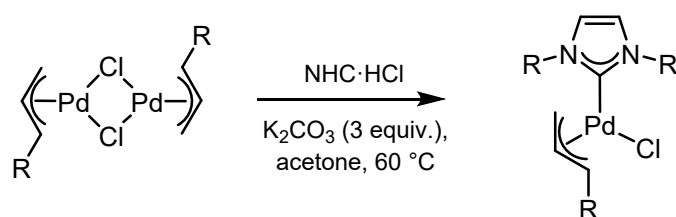

Scheme S2: Synthesis of the  $[(\text{NHC})\text{Pd}(\eta^3\text{-R-allyl})\text{Cl}]$  via weak base route.

### Pd-synthon route:

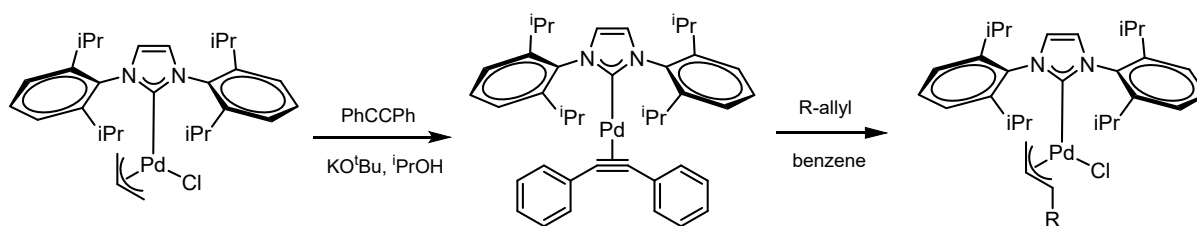

Scheme S3: Synthesis of the  $\text{Pd}^0$ -synthon and subsequent oxidative addition of the R-allyl chloride

**$[(\text{IPr})\text{Pd}(\eta^3\text{-p-tol-allyl})\text{Cl}]$  (IPr-1)** was synthesized using the weak procedure from  $[\text{Pd}(\eta^3\text{-p-tol-allyl})(\mu\text{-Cl})_2]$  (**5**) (100 mg; 0.18 mmol), IPr·HCl (184 mg; 0.43 mmol) and  $\text{K}_2\text{CO}_3$  (75 mg; 0.54 mmol) in mmol 0.45 yield (81 %) or synthesized using the Pd-synthon route using  $[\text{Pd}(\text{IPr})(\text{PhC}\equiv\text{CPh})]$  (100 mg; 0.15 mmol) and p-tol-allyl chloride (**1**) (25 mg; 0.15 mmol) in 0.13 mmol yield (87 %). Isolated as an off-white solid.  $^1\text{H}$ -NMR (300 MHz,  $\text{CDCl}_3$ , 298 K)  $\delta$  7.37 (t, 2H,  $J = 7.7$  Hz), 7.21 (d, 4H,  $J = 7.7$  Hz), 7.08 (s, 2H), 6.97 (d, 2H,  $J = 8.1$  Hz), 6.87 (d, 2H,  $J = 8.1$  Hz), 4.97 (m, 1H), 4.27 (d, 1H,  $J = 12.7$  Hz), 2.90 (m, 4H), 2.09 (s, 3H), 1.63 (d, 2H,  $J = 11.7$  Hz), 1.30 (m, 12H), 1.07 (s, 6H), 1.05 (s, 6H), 0.99 (d, 1H,  $J = 6.8$  Hz).  $^{13}\text{C}$ -{H}-NMR (400 MHz,  $\text{CDCl}_3$ , 298 K) 186.3, 146.1, 136.3, 136.0, 134.9, 129.9, 129.1, 128.8, 127.7, 127.2, 124.2, 123.8, 123.6, 108.2, 90.9, 45.9, 29.3, 28.6, 26.2, 26.0, 23.0, 22.9, 21.3. Elemental Analysis: calcd for  $\text{C}_{37}\text{H}_{48}\text{ClN}_2\text{Pd}$ : C: 67.06, H: 7.30, N:4.23; Found: C: 66.99, H: 7.09, N: 4.19.

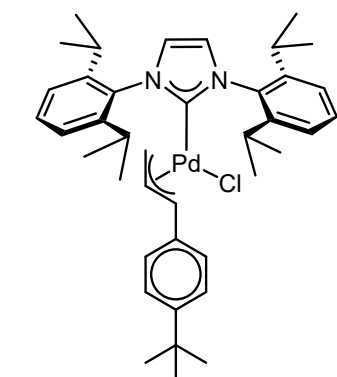

**$[(\text{IPr})\text{Pd}(\eta^3\text{-p-}^t\text{Bu-cin})\text{Cl}]$  (IPr-2)** was synthesized using the weak procedure from  $[\text{Pd}(\eta^3\text{-p-}^t\text{Bu-cin})(\mu\text{-Cl})_2]$  (**6**) (100 mg; 0.16 mmol),

IPr·HCl (119 mg; 0.38 mmol) and  $K_2CO_3$  (48 mg; mmol) in 0.26 mmol yield (81 %) or synthesized using the Pd-synthon route using  $[Pd(IPr)(PhC\equiv CPh)]$  (100 mg; 0.15 mmol) and *p*-<sup>t</sup>Bu-cinnamyl chloride (**2**) (31 mg; 0.15 mmol) in 0.14 mmol yield (93 %). Isolated as an off-white solid.  $^1H$ -NMR (300 MHz,  $CDCl_3$ , 298 K)  $\delta$  7.38 (t, 2H,  $J = 7.6$  Hz), 7.22 (d, 4H,  $J = 7.6$  Hz), 7.10 (d, 2H,  $J = 8.4$  Hz), 7.09 (s, 2H), 7.03 (d, 2H,  $J = 8.4$  Hz), 4.98 (m, 1H), 4.30 (d, 1H,  $J = 12.8$  Hz), 3.00 (m, 2H), 2.86 (m, 2H), 2.79 (d, 1H,  $J = 6.7$  Hz), 1.60 (d, 2H,  $J = 12.8$  Hz), 1.30 (m, 12H), 1.15 (s, 9H), 1.07 (s, 6H), 1.05 (s, 6H).  $^{13}C$ - $\{^1H\}$ -NMR (400 MHz,  $CDCl_3$ , 298 K) 185.2, 149.3, 146.1, 136.0, 134.9, 129.9, 127.1, 125.3, 124.1, 123.8, 108.5, 91.4, 45.5, 31.2, 31.0, 28.6, 26.2, 25.9, 23.0, 22.9. Elemental Analysis: calcd for  $C_{40}H_{54}ClN_2Pd$ : C: 68.17, H: 7.72, N:3.97; Found: C: 68.27, H: 7.59, N: 3.98.

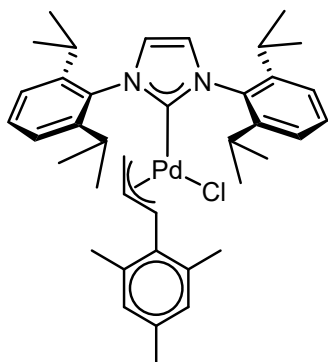

**[(IPr)Pd( $\eta^3$ -mes-allyl)Cl] (IPr-3)** was synthesized using the weak procedure from  $[Pd(\eta^3$ -mes-allyl)( $\mu$ -Cl)]<sub>2</sub> (**7**) (100 mg; 0.17 mmol), IPr·HCl (123 mg; 0.39 mmol) and  $K_2CO_3$  (0.51 mg; 71 mmol) in 0.29 mmol yield (85 %) or synthesized using the Pd-synthon route using  $[Pd(IPr)(PhC\equiv CPh)]$  (100 mg; 0.15 mmol) and 2,4,6-trimethylcinnamyl chloride (**3**) (30 mg; 0.15 mmol) in 0.14 mmol yield (93 %). Isolated as an off-white solid.  $^1H$ -NMR (300 MHz,  $CDCl_3$ , 298 K)  $\delta$  7.38 (t, 2H,  $J = 7.7$  Hz), 7.22 (d, 4H,  $J = 7.2$  Hz), 7.11 (s, 2H), 6.57 (s, 2H), 4.98 (dt, 1H,  $J_1 = 13.3$  Hz,  $J_2 = 9.07$  Hz), 4.30 (d, 1H,  $J = 13.3$  Hz), 3.10 (m, 4H), 2.90 (broad s, 1H), 2.81 (m, 2H), 2.01 (s, 3H), 1.97 (s, 6H), 1.61 (d, 2H,  $J = 9.1$  Hz), 1.30 (broad s, 12H), 1.09 (broad s, 6H), 1.03 (broad s, 6H), 1.05 (s, 6H).  $^{13}C$ - $\{^1H\}$ -NMR (400 MHz,  $CDCl_3$ , 298 K) 186.3, 146.1, 136.3, 136.0, 134.9, 129.9, 129.1, 127.7, 124.1, 123.8, 108.2, 90.9, 45.9, 28.6, 26.2, 26.0, 23.0, 22.9, 21.3, 14.1. Elemental Analysis: calcd for  $C_{39}H_{52}ClN_2Pd$ : C: 67.82, H: 7.59, N: 4.06; Found: C: 68.18, H: 7.61, N: 3.92.

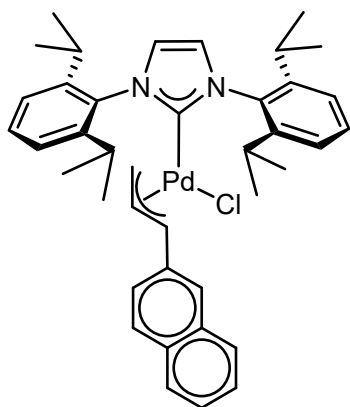

**[(IPr)Pd( $\eta^3$ -2-naph-allyl)Cl] (IPr-4)** was synthesized using the weak procedure from  $[Pd(\eta^3$ -2-naph-allyl)( $\mu$ -Cl)]<sub>2</sub> (**8**) (100 mg; 0.16 mmol), IPr·HCl (162 mg; 0.38 mmol) and  $K_2CO_3$  (66 mg, 0.48 mmol) in 0.26 mmol yield (79 %) or synthesized using the Pd-synthon route using  $[Pd(IPr)(PhC\equiv CPh)]$  (100 mg; 0.15 mmol) and 2-(3-chloro-1-propen-1-yl)-naphthalene (**4**) (31 mg; 0.15 mmol) in 0.12 mmol yield (80 %). Isolated as yellow solid  $^1H$ -NMR (300 MHz,  $CDCl_3$ , 298 K)  $\delta$  7.56 (m, 4H), 7.42 (t, 2H,  $J = 7.7$  Hz), 7.27 (m, 6H), 7.16 (dd, 1H,  $J_1 = 8.5$  Hz,  $J_2 = 1.7$  Hz), 7.12 (s, 2H), 5.12 (m, 1H), 4.42 (d, 1H,  $J = 12.6$  Hz), 2.95 (m, 5H), 1.79 (d, 1H,  $J = 11.6$  Hz), 1.33 (m, 12H), 1.21 (m, 1H), 1.08 (m, 12H).  $^{13}C$ - $\{^1H\}$ -NMR (400 MHz,  $CDCl_3$ , 298 K) 185.0, 146.1, 145.9, 145.7, 145.1, 135.9, 135.7, 133.6, 132.6, 129.9, 127.9, 127.8, 127.6, 126.5, 125.7, 125.3, 125.2, 124.8, 124.2, 123.9, 123.5, 123.4, 108.9, 89.9, 46.7, 28.6, 26.2, 26.1, 23.0, 22.9, 14.1. Elemental Analysis: calcd for  $C_{40}H_{48}ClN_2Pd$ : C: 68.76, H: 6.92, N: 4.01; Found: C:68.66, H: 7.06, N: 4.00.

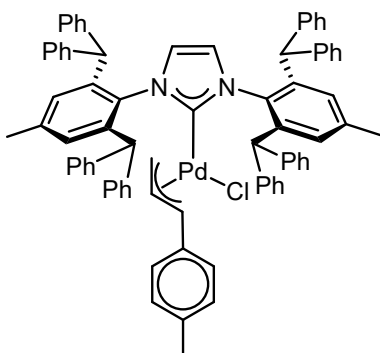

**[(IPr\*)Pd( $\eta^3$ -p-tol-allyl)Cl] (IPr\*-1)** was synthesized using the weak procedure from  $[Pd(\eta^3$ -p-tol-allyl)( $\mu$ -Cl)]<sub>2</sub> (**1**) (100 mg; 0.18 mmol), IPr\*·HCl (410 mg; 0.43 mmol) and  $K_2CO_3$  (75 mg; mmol) in 0.32

mmol yield (89 %) Isolated as a pale yellow solid.  $^1\text{H-NMR}$  (300 MHz,  $\text{CDCl}_3$ , 298 K)  $\delta$  7.32 (d, 2H,  $J = 7.8$  Hz), 7.20 (m, 12H), 7.14 (m, 12H), 7.02 (m, 12H), 6.75 (m, 12H), 5.99 (s, 2H), 5.67 (s, 2H), 4.93 (m, 1H), 4.57 (d, 1H,  $J = 13.1$  Hz), 2.48 (d, 1H,  $J = 6.7$  Hz), 2.26 (s, 3H), 2.15 (s, 6H), 1.15 (d, 1H,  $J = 11.3$  Hz).  $^{13}\text{C}\{-\text{H}\}$ -NMR (75 MHz,  $\text{CDCl}_3$ , 298 K)  $\delta$  182.9, 144.6, 143.9, 141.4, 140.6, 138.4, 137.0, 135.9, 134.8, 130.6, 130.3, 129.5, 129.3, 129.3, 128.4, 128.3, 127.6, 126.4, 123.5, 108.4, 92.1, 51.5, 47.0, 29.4, 22.0, 21.7. Elemental Analysis: calcd for  $\text{C}_{37}\text{H}_{48}\text{ClN}_2\text{Pd}$ : C: 67.06, H: 7.30, N:4.23; Found: C: 66.99, H: 7.09, N: 4.19.

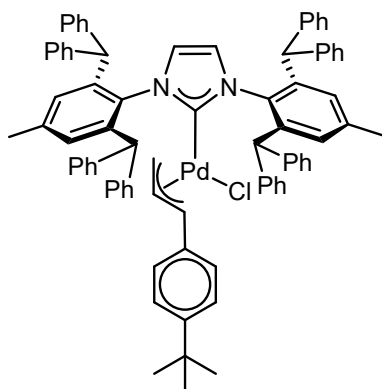

**[(IPr\*)Pd( $\eta^3$ -p-tBu-cin)Cl] (IPr\*-2)** was synthesized using the weak procedure from  $[\text{Pd}(\eta^3\text{-p-tBu-cin})(\mu\text{-Cl})]_2$  (**2**) (100 mg; 0.16 mmol), IPr\*·HCl ( mg; 0.38 mmol) and  $\text{K}_2\text{CO}_3$  (66 mg; 0.48 mmol) in 0.25 mmol yield (79 %) Isolated as a pale yellow solid.  $^1\text{H-NMR}$  (300 MHz,  $\text{CDCl}_3$ , 298 K)  $\delta$  7.38 (d, 2H,  $J = 8.2$  Hz), 7.32 (d, 2H,  $J = 8.2$  Hz), 7.22 (m, 12H), 7.11 (m, 10H), 7.01 (m, 12H), 6.74 (m, 12H), 5.98 (s, 2H), 5.72 (s, 2H), 4.89 (m, 1H), 4.60 (d, 1H,  $J = 13.1$  Hz), 2.49 (d, 1H,  $J = 6.4$  Hz), 2.15 (s, 6H), 1.29 (s, 9H), 1.14 (d, 1H,  $J = 10.9$  Hz).  $^{13}\text{C}\{-\text{H}\}$ -NMR (75 MHz,  $\text{CDCl}_3$ , 298 K)  $\delta$  182.7, 149.8, 144.5, 143.8, 143.7, 141.2, 140.6, 138.3, 135.9, 134.9, 130.5, 130.3, 129.2, 128.3, 128.1, 127.5, 126.3, 125.6, 123.4, 108.9, 92.1, 51.4, 47.1, 34.7, 31.3, 29.3,

21.9, 21.7. Elemental Analysis: calcd for  $\text{C}_{37}\text{H}_{48}\text{ClN}_2\text{Pd}$ : C: 67.06, H: 7.30, N:4.23; Found: C: 66.99, H: 7.09, N: 4.19.

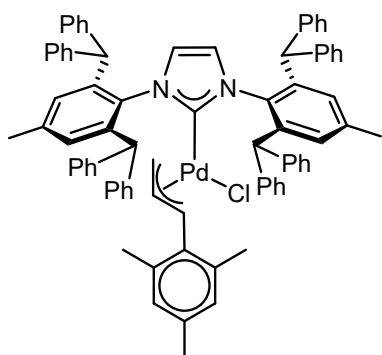

**[(IPr\*)Pd( $\eta^3$ -mes-allyl)Cl] (IPr\*-3)** was synthesized using the weak procedure from  $[\text{Pd}(\eta^3\text{-p-mes-allyl})(\mu\text{-Cl})]_2$  (**3**) (100 mg; 0.17 mmol), IPr\*·HCl (378 mg; 0.39 mmol) and  $\text{K}_2\text{CO}_3$  (71 mg; 0.51 mmol) in 0.28 mmol yield (85 %) Isolated as pale yellow solid.  $^1\text{H-NMR}$  (300 MHz,  $\text{CDCl}_3$ , 298 K).  $^{13}\text{C}\{-\text{H}\}$ -NMR (75 MHz,  $\text{CDCl}_3$ , 298 K)  $\delta$  184.4, 144.4, 143.8, 143.5, 138.3, 136.7, 136.0, 135.8, 132.0, 131.9, 129.2, 128.3, 128.1, 127.5, 126.3, 125.6, 123.4, 108.9, 92.1, 51.4, 47.1, 34.7, 31.3, 29.3, 21.9, 21.7. HRMS Analysis:  $[\text{M}^+]\text{-Cl}$  for  $\text{C}_{81}\text{H}_{71}\text{ClN}_2\text{Pd}$ : Calcd:  $[\text{M}^+]\text{-Cl}$ : 1177.47; Found: 1177.4647.

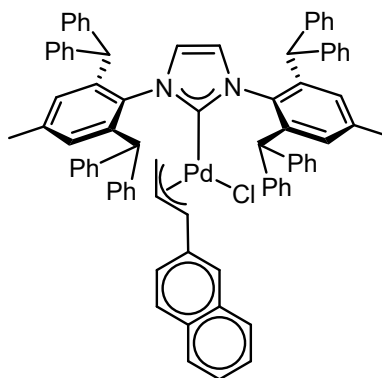

**[(IPr\*)Pd( $\eta^3$ -2-naph-allyl)Cl] (IPr\*-4)** was synthesized using the weak procedure from  $[\text{Pd}(\eta^3\text{-2-naph-allyl})(\mu\text{-Cl})]_2$  (**4**) (100 mg; 0.16 mmol), IPr\*·HCl (361 mg; 0.38 mmol) and  $\text{K}_2\text{CO}_3$  ( mg; mmol) in mmol yield ( %) Isolated as a pale yellow solid.  $^1\text{H-NMR}$  (300 MHz,  $\text{CDCl}_3$ , 298 K)  $\delta$  7.38 (d, 2H,  $J = 8.2$  Hz), 7.32 (d, 2H,  $J = 8.2$  Hz), 7.22 (m, 12H), 7.11 (m, 10H), 7.01 (m, 12H), 6.74 (m, 12H), 5.98 (s, 2H), 5.72 (s, 2H), 4.89 (m, 1H), 4.60 (d, 1H,  $J = 13.1$  Hz), 2.49 (d, 1H,  $J = 6.4$  Hz), 2.15 (s, 6H), 1.29 (s, 9H), 1.14 (d, 1H,  $J = 10.9$  Hz).  $^{13}\text{C}\{-\text{H}\}$ -NMR (75 MHz,  $\text{CDCl}_3$ , 298 K)  $\delta$  182.5, 144.5, 143.8, 143.7, 142.9, 142.5, 141.3, 140.6, 138.4, 135.8, 135.5, 133.8, 132.9, 131.9, 130.6,

130.2, 129.8, 129.5, 129.4, 129.2, 128.3, 128.3, 128.2, 128.1, 127.9, 126.3, 126.2, 126.0, 125.8, 125.5,

123.4, 108.9, 91.3, 51.5, 47.5, 21.9. Elemental Analysis: calcd for C<sub>8</sub>H<sub>6</sub>ClN<sub>2</sub>Pd: Calcd: [M<sup>+</sup>]-Cl: 1185.43; Found: 1185.4334.

## Buchwald-Hartwig cross-coupling amination

General procedure: In a glovebox, [Pd] (1 mol %), potassium tert-butoxide (0.55 mmol, 62 mg) and anhydrous dimethoxyethane (DME) (0.5 mL) were added in turn to a vial equipped with a magnetic bar, and sealed with a screw cap fitted with a septum. Outside the glovebox, the amine (0.55 mmol) and the aryl halide (0.5 mmol) were injected in turn through the septum. (If one of the two starting materials was a solid, it was added to the vial inside the glovebox and DME and the second starting material were added outside the glovebox under argon). The reaction mixture was then stirred at room temperature. When the reaction reached completion, or no further conversion could be observed by gas chromatography, water was added to the reaction mixture, the organic layer was extracted with diethyl ether, dried over magnesium sulfate and the solvent was evaporated in vacuo. When necessary the product was purified by flash chromatography on silica gel. The reported yields are the average of at least two runs.

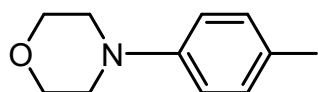

**4-(p-tolyl)morpholine (5a)** was synthesized using the procedure from 4-methylchlorobenzene and morpholine, in 0.48 mmol yield (96 %) Isolated as an off-white solid. <sup>1</sup>H-NMR (300 MHz, CDCl<sub>3</sub>, 298 K) δ 7.12 (m, 2H), 6.86 (m, 2H), 3.89 (m, 4H), 3.14 (m, 4H), 2.30 (s, 3H). The NMR data are consistent with the reported literature<sup>5</sup>.

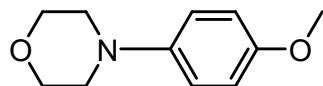

**4-(4-methoxyphenyl)morpholine (5b)** was synthesized using the Buchwald-Hartwig procedure from 4-methoxychlorobenzene and morpholine, in 0.49 mmol yield (98 %) Isolated as an off-white solid. <sup>1</sup>H-NMR (300 MHz, CDCl<sub>3</sub>, 298 K) δ 6.90 (m, 4H), 3.89 (m, 4H), 3.80 (s, 3H), 3.08 (m, 4H). The NMR data are consistent with the reported literature<sup>6</sup>.

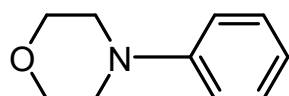

**4-phenylmorpholine (5c)** was synthesized using the procedure from 4-chlorobenzene and morpholine, in 0.49 mmol yield (98 %) Isolated as an off-white solid. <sup>1</sup>H-NMR (300 MHz, CDCl<sub>3</sub>, 298 K) δ 7.31 (m, 2H), 6.94 (m, 3H), 3.89 (m, 4H), 3.19 (m, 4H). The NMR data are consistent with the reported literature<sup>5</sup>.

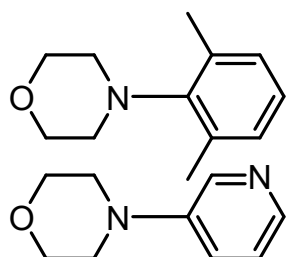

**4-(2,6-dimethylphenyl)morpholine (5d)** was synthesized using the procedure from 2,6-dichloro-*m*-xylene and morpholine, in 0.5 mmol yield (99 %) Isolated as an off-white solid. <sup>1</sup>H-NMR (300 MHz, CDCl<sub>3</sub>, 298 K) δ 7.02 (m, 3H), 3.83 (m, 4H), 3.13 (m, 4H), 2.37 (s, 6H). The NMR data are consistent with the reported literature<sup>5</sup>.

**4-(pyridin-3-yl)morpholine (5e)** was synthesized using the procedure from 3-chloropyridine and morpholine, in 0.4 mmol yield (80 %) Isolated as an off-white solid. <sup>1</sup>H-NMR (300 MHz, CDCl<sub>3</sub>, 298 K) δ 8.24 (s, 1H), 8.06 (s, 1H), 7.11 (m, 2H), 3.81 (m, 4H), 3.12 (m, 4H). The NMR data are consistent with the reported literature<sup>5</sup>.



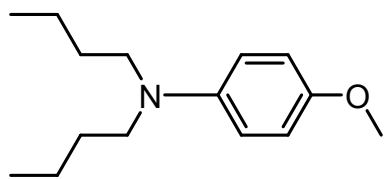

**N,N-dibutyl-4-methoxyaniline (5f)** was synthesized using the procedure from 4-methoxychlorobenzene and dibutylamine, in 0.46 mmol yield (92 %) Isolated as a yellow oil.  $^1\text{H-NMR}$  (300 MHz,  $\text{CDCl}_3$ , 298 K)  $\delta$  6.82 (m, 2H), 6.65 (d, 2H,  $J = 8.7$  Hz), 3.75 (s, 3H), 3.17 (m, 4H), 1.50 (m, 4H), 1.33 (m, 4H), 0.93 (t, 4H,  $J = 7.3$  Hz). The NMR data are consistent with the reported literature<sup>7</sup>.

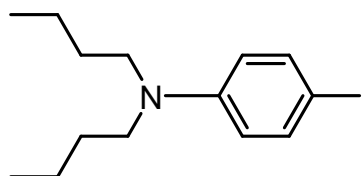

**N,N-dibutyl-4-methylaniline (5g)** was synthesized using the procedure from 4-methylchlorobenzene and dibutylamine, in 0.43 mmol yield (85 %) Isolated as a yellow oil.  $^1\text{H-NMR}$  (300 MHz,  $\text{CDCl}_3$ , 298 K)  $\delta$  7.01 (m, 2H), 6.58 (d, 2H,  $J = 6.6$  Hz), 3.23 (m, 4H), 2.24 (s, 3H), 1.54 (m, 4H), 1.34 (m, 4H), 0.94 (t, 4H,  $J = 7.2$  Hz). The NMR data are consistent with the reported literature<sup>7</sup>.

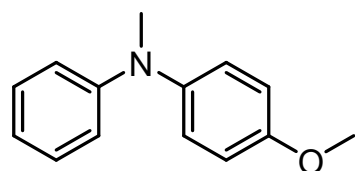

**4-methoxy-N-methyl-N-phenylaniline (5h)** was synthesized using the procedure from 4-methoxychlorobenzene and N-methylaniline, in 0.47 mmol yield (95 %) Isolated as an off-white solid.  $^1\text{H-NMR}$  (300 MHz,  $\text{CDCl}_3$ , 298 K)  $\delta$  7.24 (dd, 2H,  $J_1 = 8.9$  Hz,  $J_2 = 7.2$  Hz), 7.16 (d, 2H,  $J = 8.9$  Hz), 6.89 (m, 5H), 3.84 (s, 3H), 3.30 (s, 3H). The NMR data are consistent with the reported literature<sup>5</sup>.

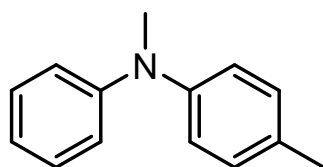

**4-methoxy-N-methyl-N-phenylaniline (5i)** was synthesized using the procedure from 4-methoxychlorobenzene and N-methylaniline, in 0.4 mmol yield (80 %) Isolated as an off-white solid.  $^1\text{H-NMR}$  (300 MHz,  $\text{CDCl}_3$ , 298 K)  $\delta$  7.23 (m, 2H), 7.12 (m, 2H), 6.99 (m, 2H), 6.92 (m, 2H), 6.87 (m, 1H), 3.28 (s, 3H), 2.32 (s, 3H). The NMR data are consistent with the reported literature<sup>5</sup>.

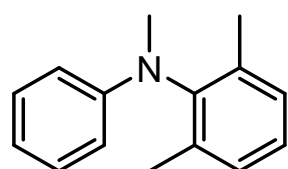

**4-methoxy-N-methyl-N-phenylaniline (5j)** was synthesized using the procedure from 4-methoxychlorobenzene and N-methylaniline, in 0.48 mmol yield (97 %) Isolated as an off-white solid.  $^1\text{H-NMR}$  (300 MHz,  $\text{CDCl}_3$ , 298 K)  $\delta$  7.28 (m, 4H), 6.82 (m, 2H,  $J_1 = 7.2$  Hz,  $J_2 = 1.1$  Hz), 6.57 (broad s, 1H), 6.92 (m, 2H), 3.34 (s, 3H), 2.25 (s, 6H). The NMR data are consistent with the reported literature<sup>8</sup>.

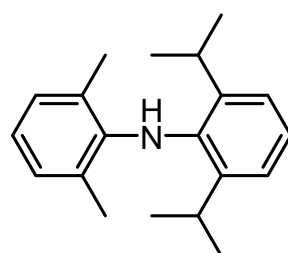

**N-(2,6-diisopropylphenyl)-2,6-dimethylaniline (5k)** was synthesized using the procedure from 4-methoxychlorobenzene and N-methylaniline, in 0.5 mmol yield (99 %) Isolated as an off-white solid.  $^1\text{H-NMR}$  (300 MHz,  $\text{CDCl}_3$ , 298 K)  $\delta$  7.14 (m, 3H), 6.95 (m, 2H), 6.74 (m, 1H), 4.81 (broad s, 1H), 3.17

(hept, 2H,  $J = 6.7$  Hz), 2.00 (s, 6H), 1.15 (s, 6H), 1.13 (s, 6H). The NMR data are consistent with the reported literature<sup>9</sup>.

### [Pd<sup>I</sup><sub>2</sub>(NHC)<sub>2</sub>( $\eta^3$ -R-allyl)( $\mu$ -Cl)] dimer formation

[(NHC)Pd( $\eta^3$ -R-allyl)Cl] (0.08 mmol, 1 eq), K<sub>2</sub>CO<sub>3</sub> (0.24 mmol), and a magnetic stirring bar were charged into a Schlenk flask, followed by 3 vacuum/argon cycles and then the degassed ethanol (3 mL) was transferred into the flask, following the reported procedure. The reaction mixture was stirred at 40 °C for 24 h. A sample of 0.1 mL was taken, the solvent was evaporated in vacuo, and CDCl<sub>3</sub> is added for analysis by <sup>1</sup>H NMR. This is done every hour until 5h to check the reaction progress. During the time, the yellow solution turns into brown color<sup>10</sup>.

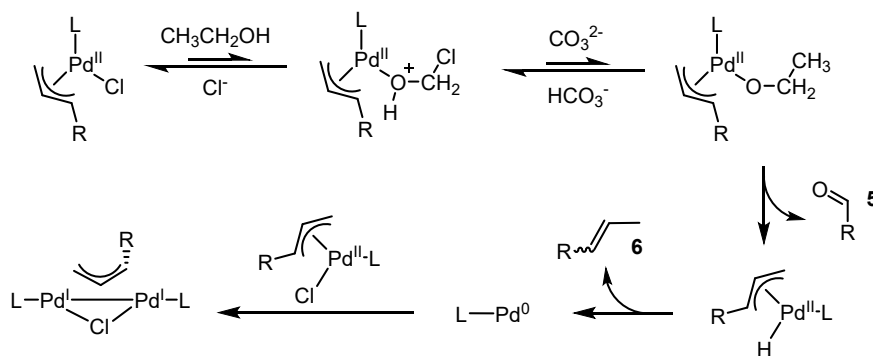

Scheme S4: Proposed mechanism for the formation of the PdI dimers with weak base.

### <sup>1</sup>H NMR spectra of Pd<sup>I</sup> dimer formation

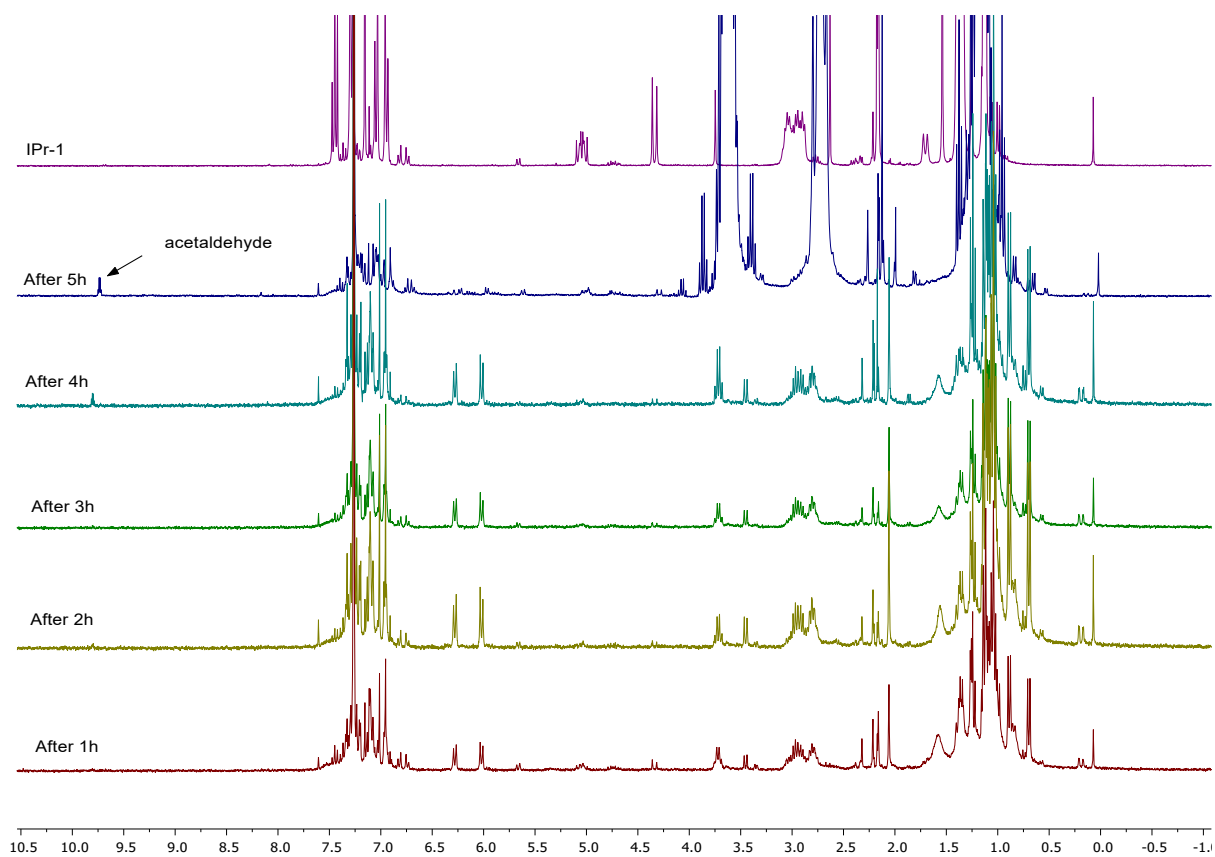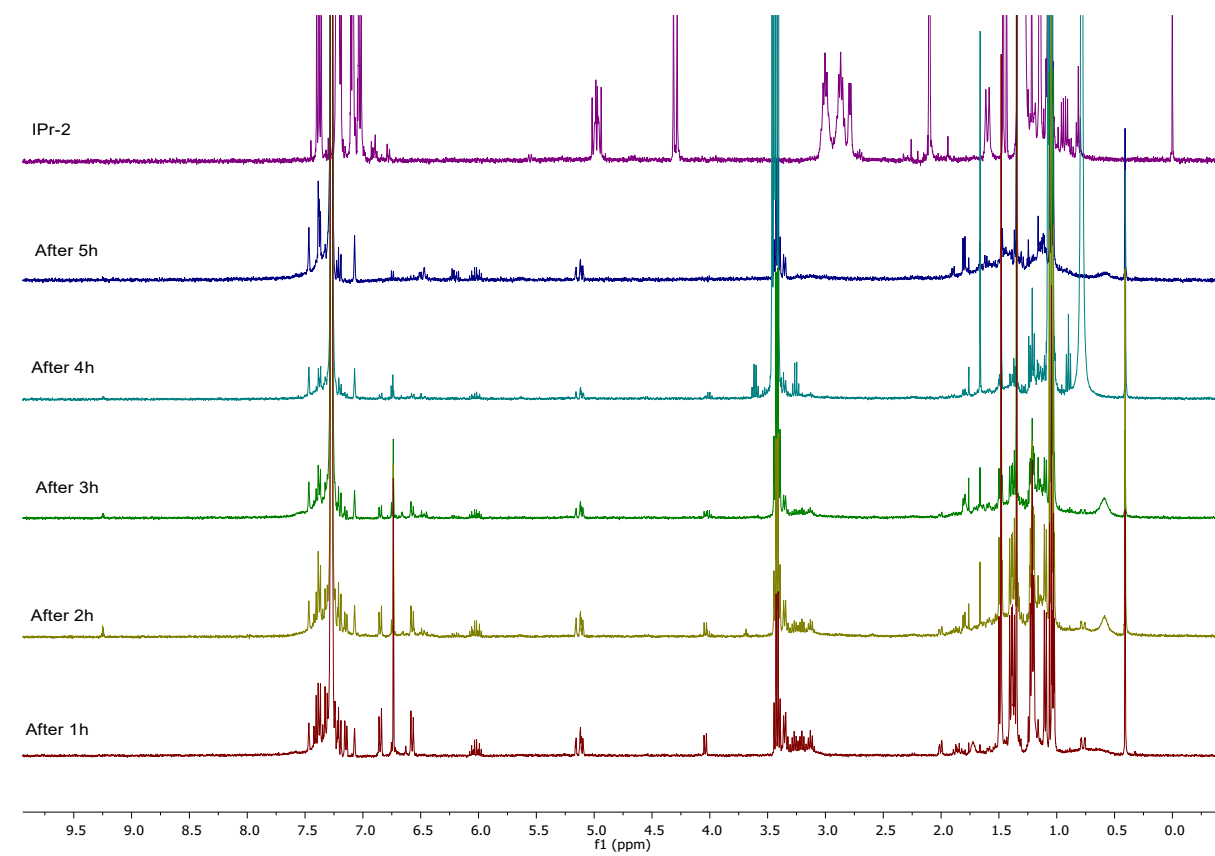

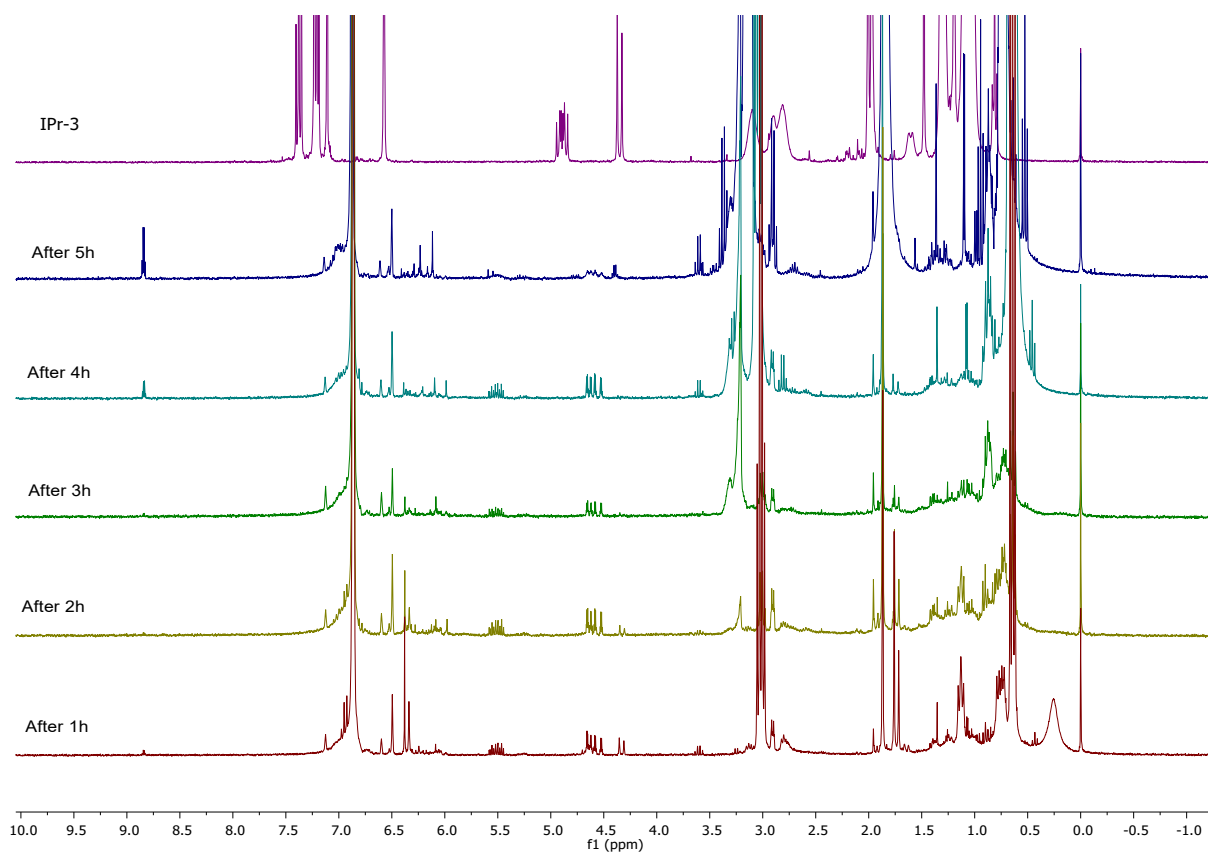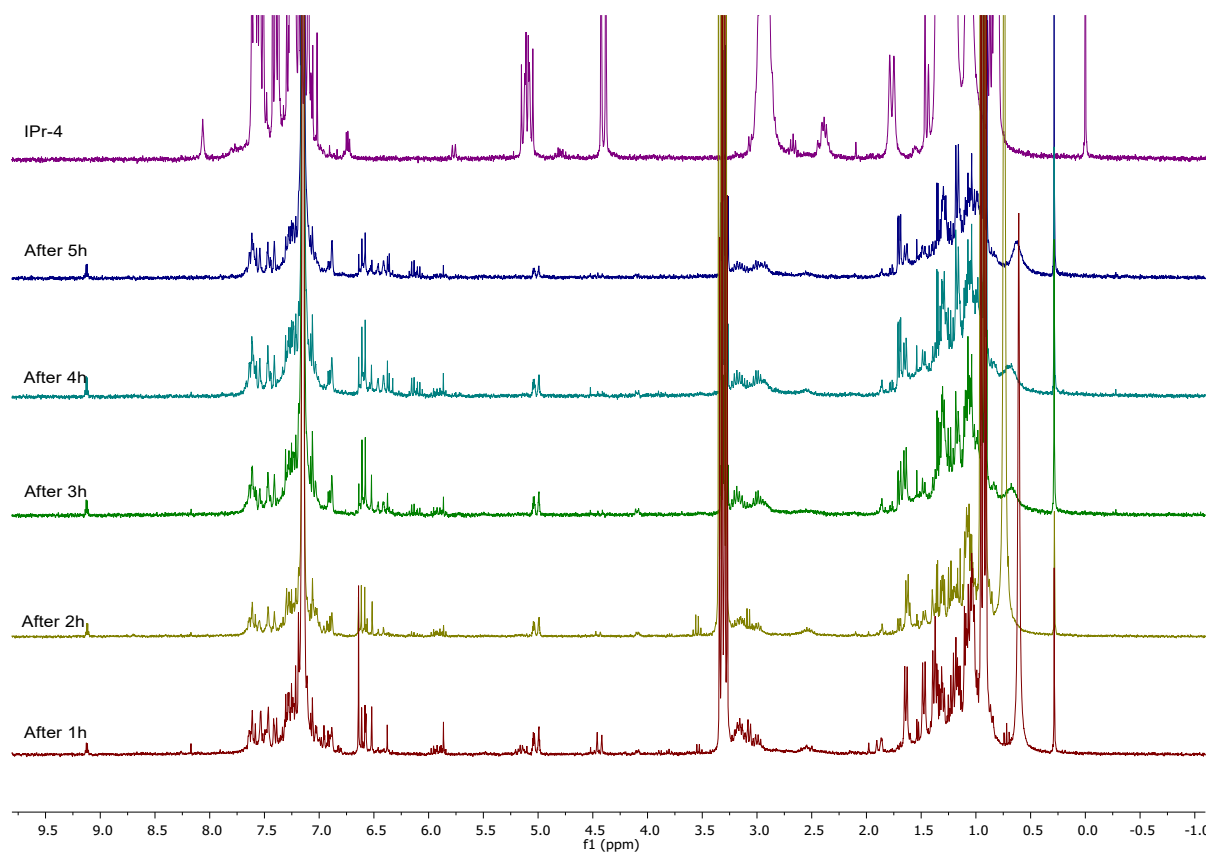

## Focus on the central proton peak area

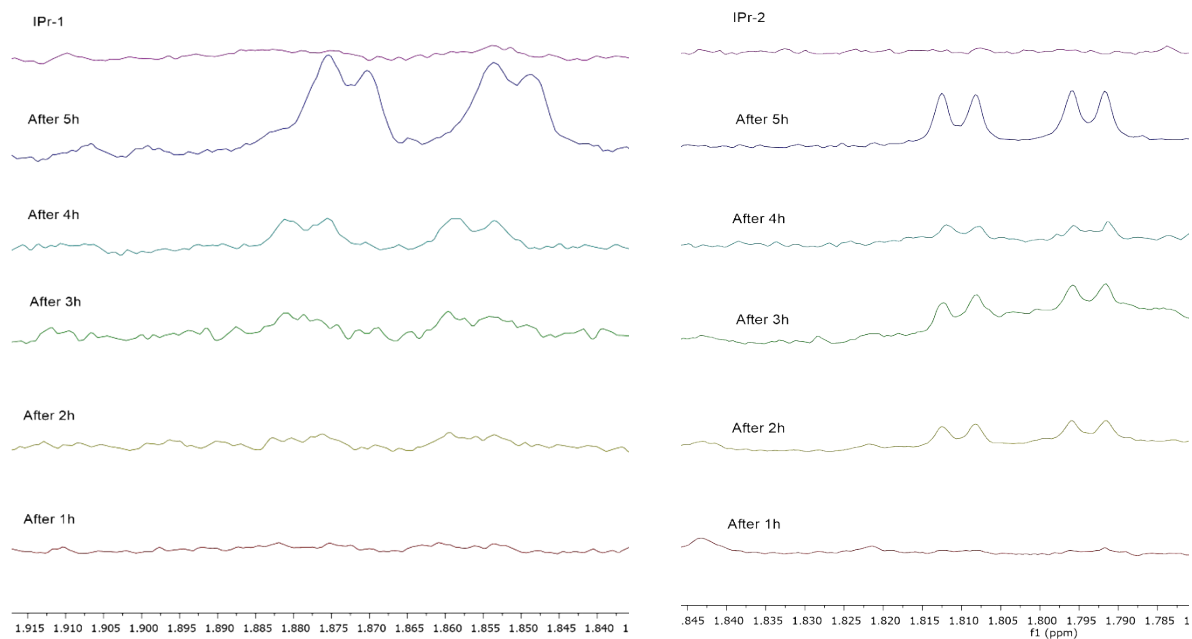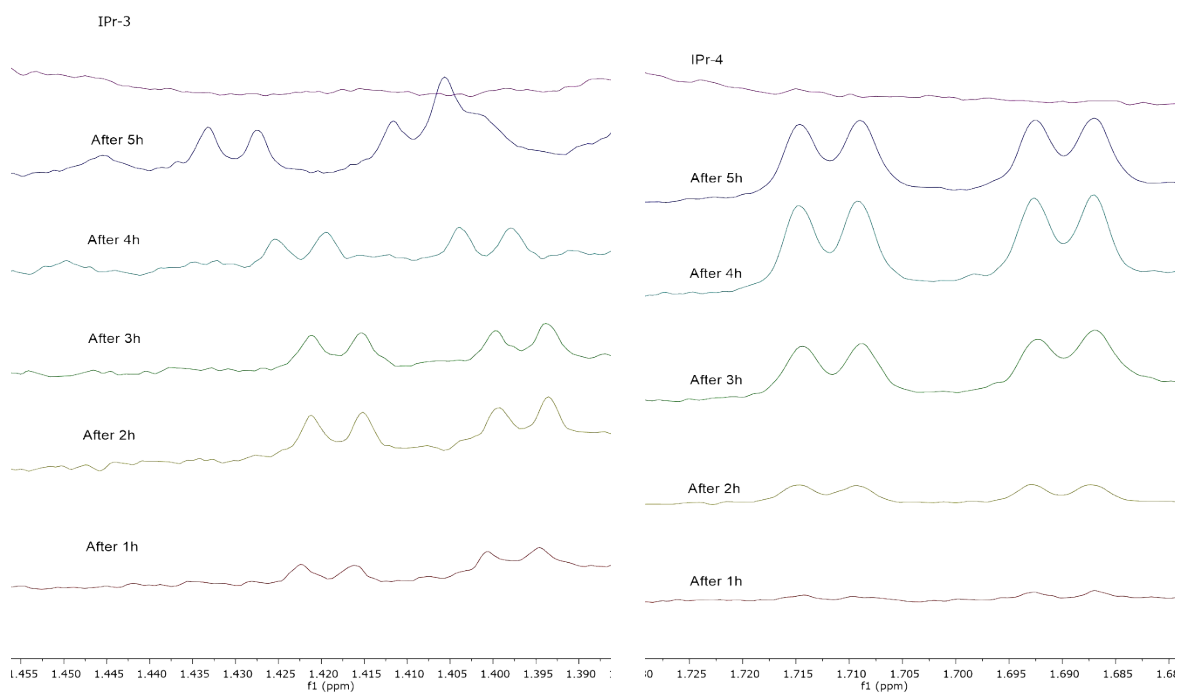

## NMR-spectra

$^1\text{H}$  NMR (400 MHz,  $\text{CDCl}_3$ ) of **1**

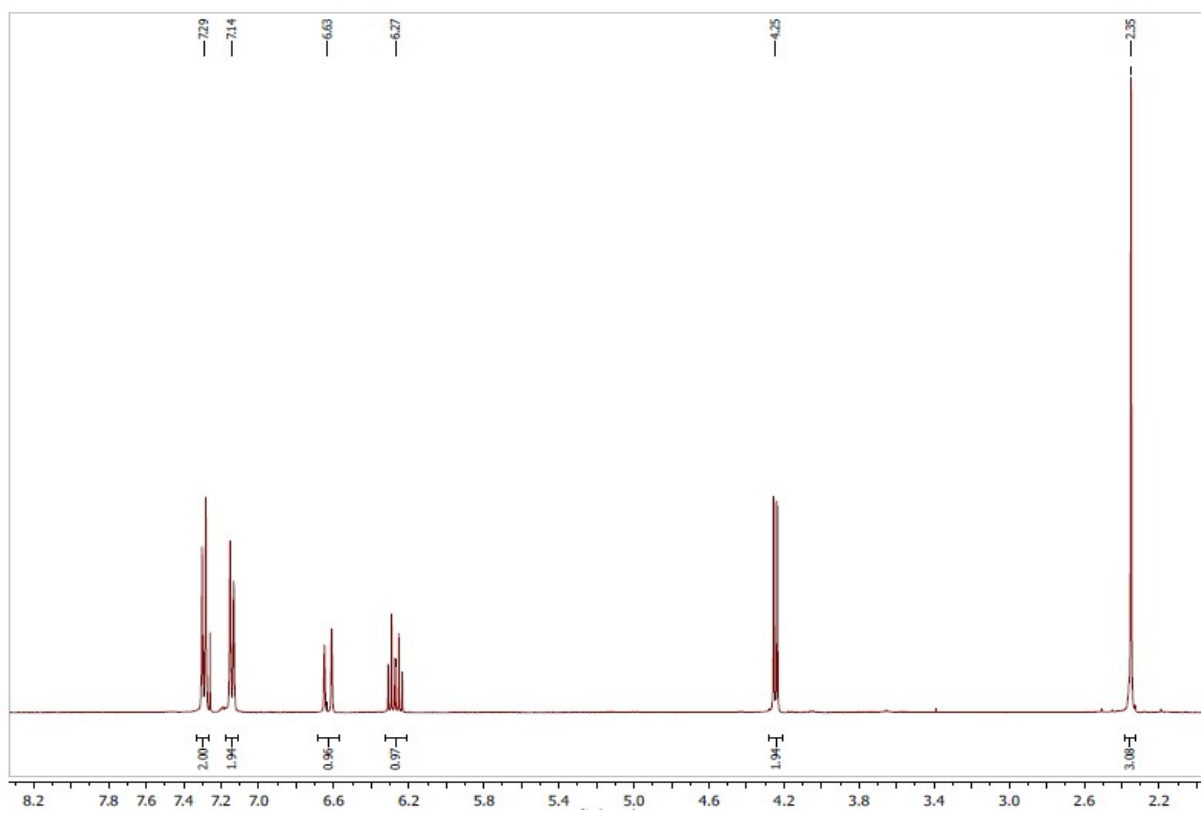

$^1\text{H}$  NMR (300 MHz,  $\text{CDCl}_3$ ) of **2**

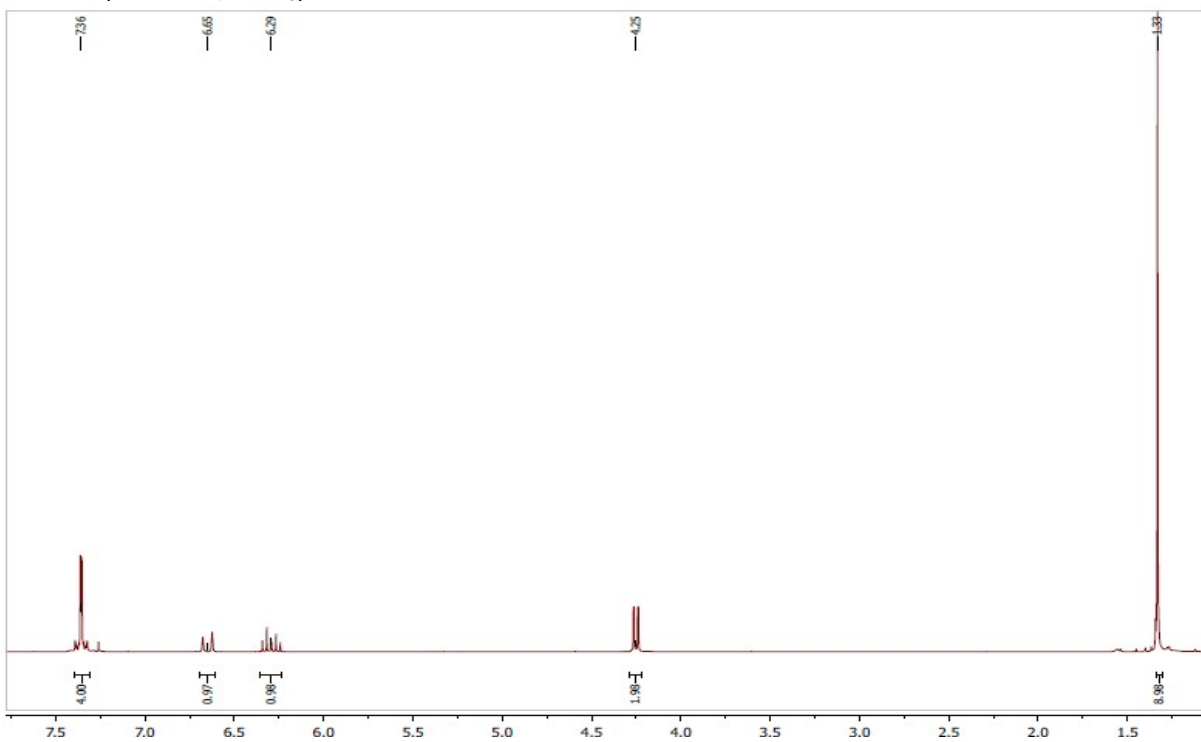

$^1\text{H}$  NMR (300 MHz,  $\text{CDCl}_3$ ) of **3**

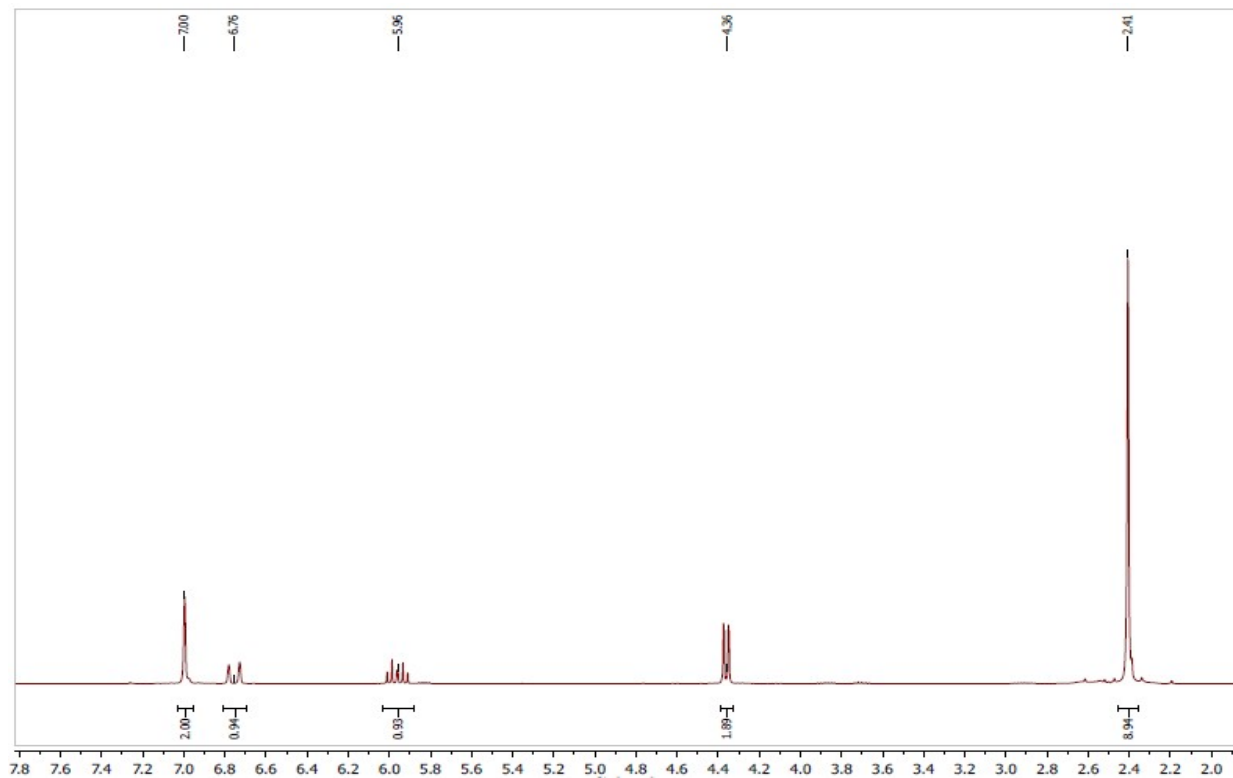

$^1\text{H}$  NMR (400 MHz,  $\text{CDCl}_3$ ) of **4**

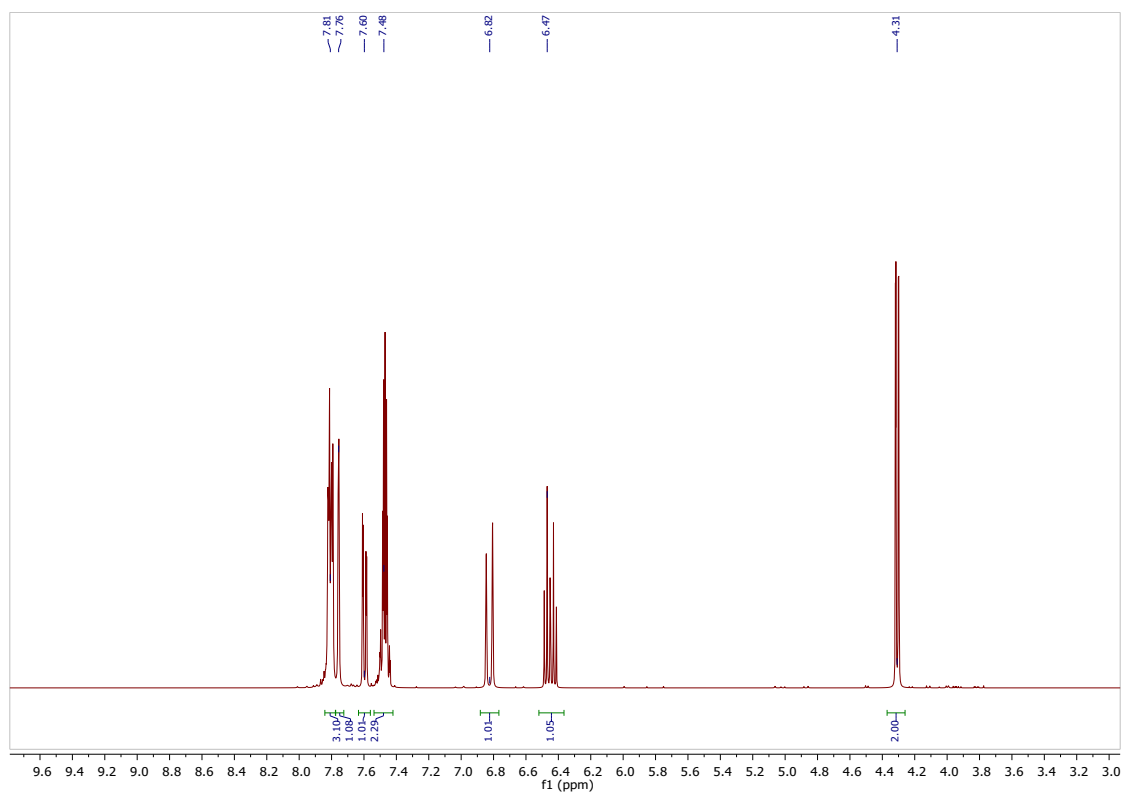

$^1\text{H}$  NMR (400 MHz,  $\text{CDCl}_3$ ) of **5**

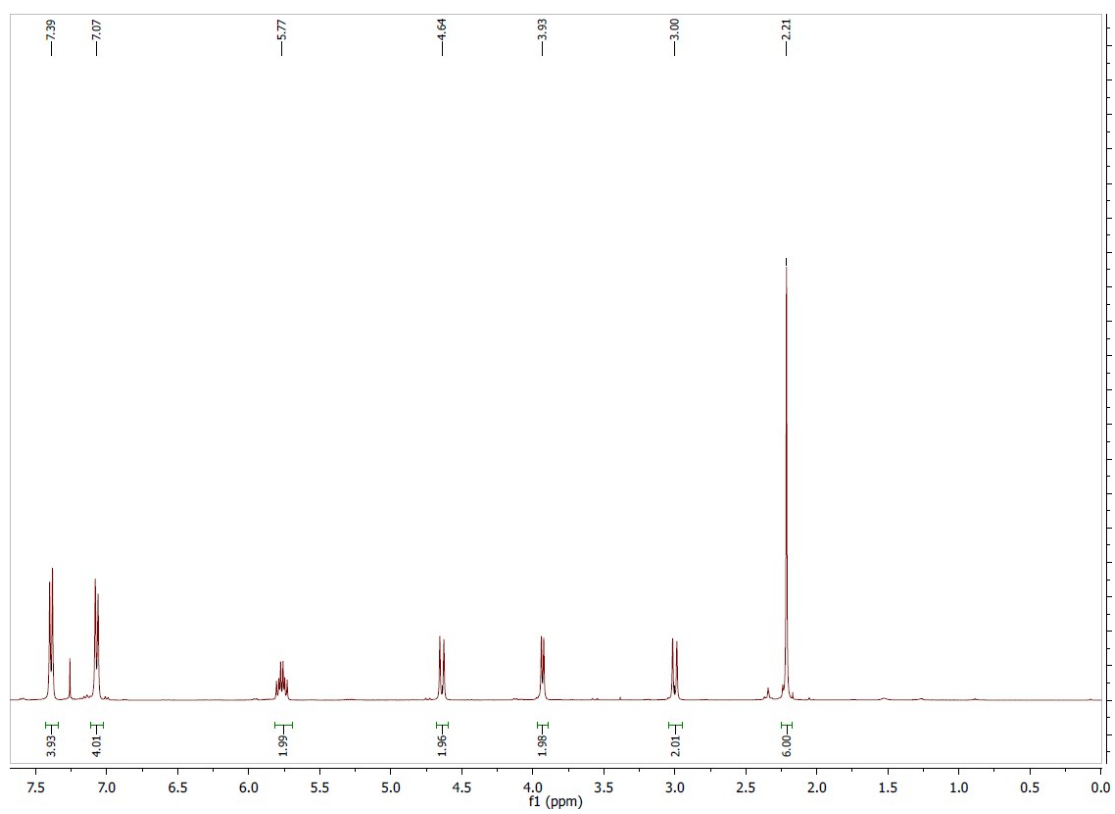

$^{13}\text{C}$  NMR (400 MHz,  $\text{CDCl}_3$ ) of **5**

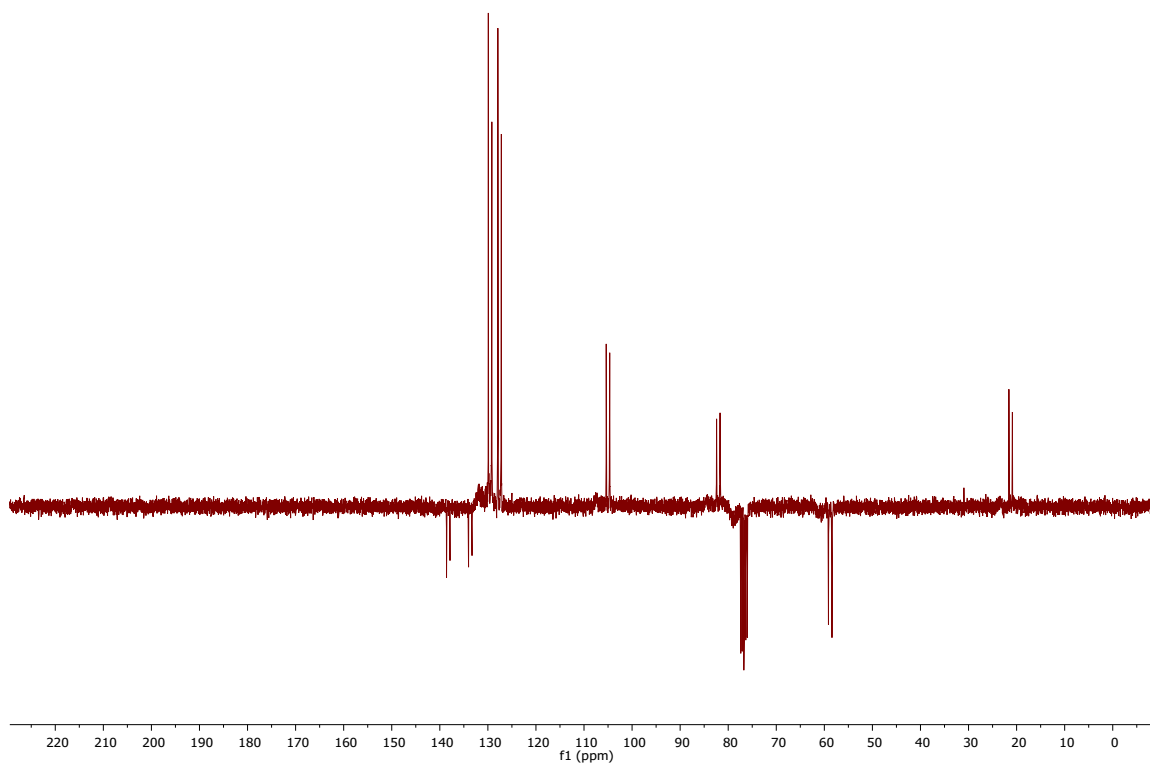



$^1\text{H}$  NMR (300 MHz,  $\text{CDCl}_3$ ) of **6**

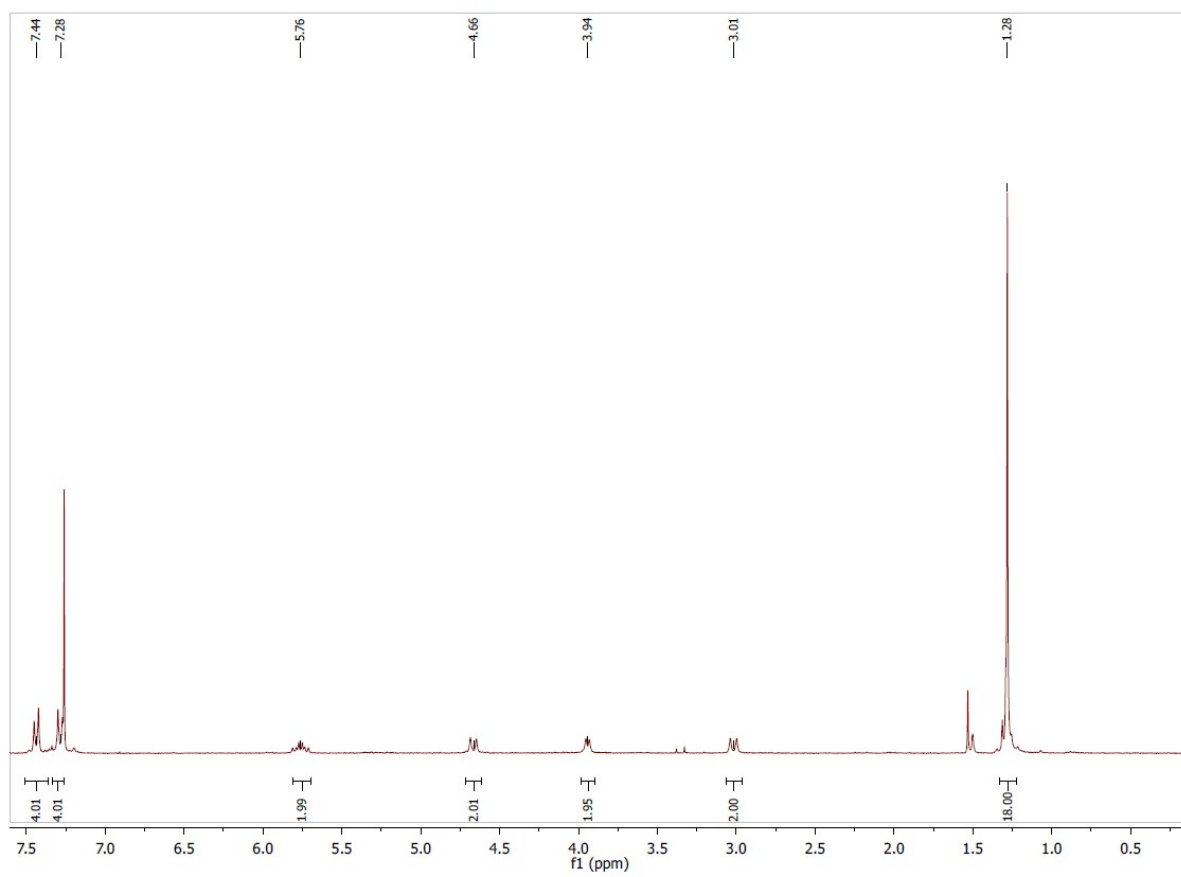

$^{13}\text{C}$  NMR (400 MHz,  $\text{CDCl}_3$ ) of **6**

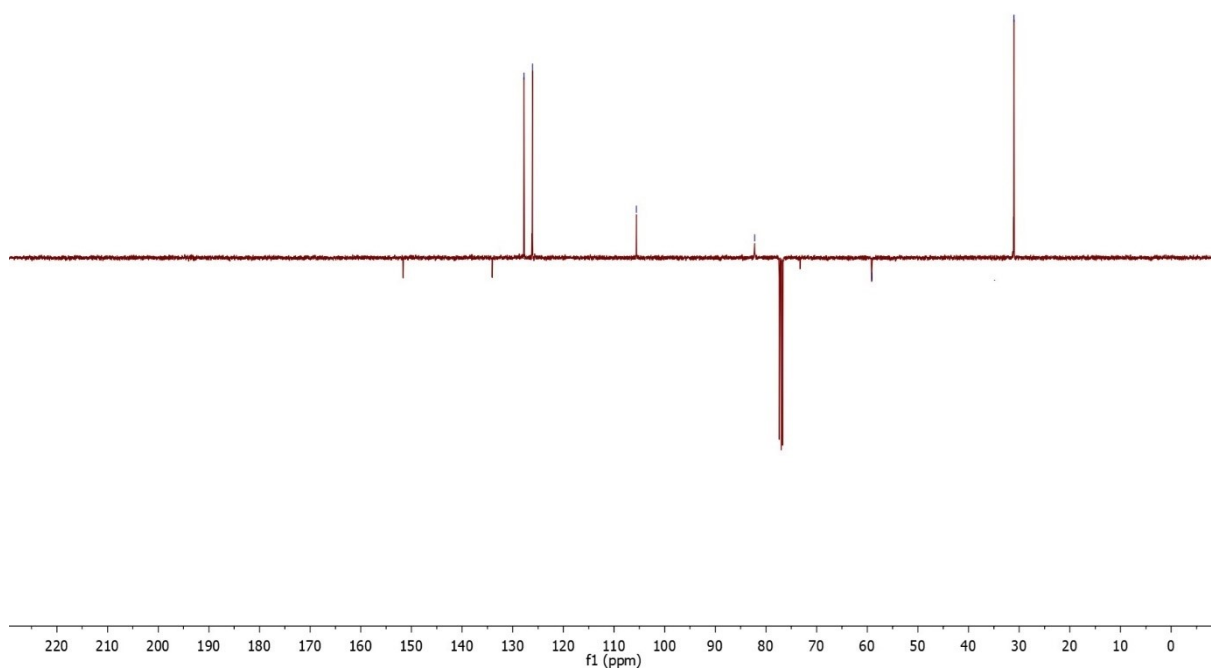

$^1\text{H}$  NMR (300 MHz,  $\text{CDCl}_3$ ) of **7**

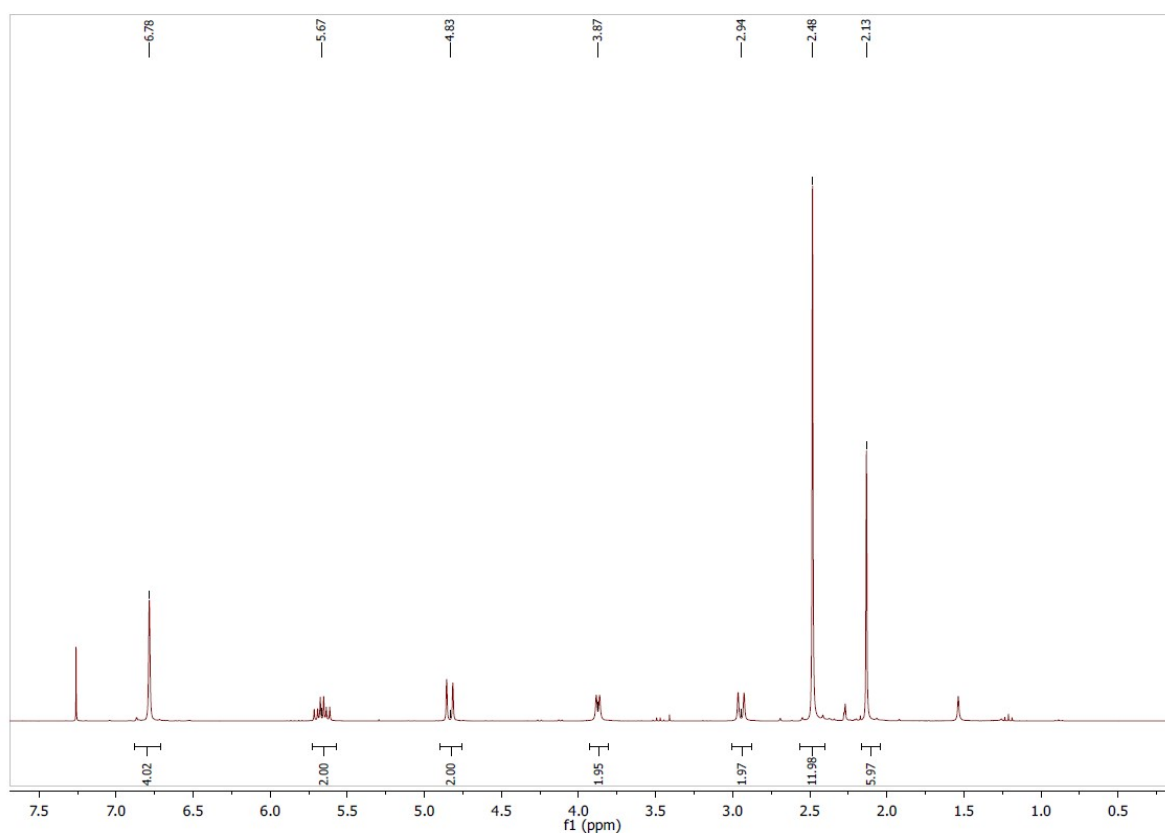

$^{13}\text{C}$  NMR (400 MHz,  $\text{CDCl}_3$ ) of **7**

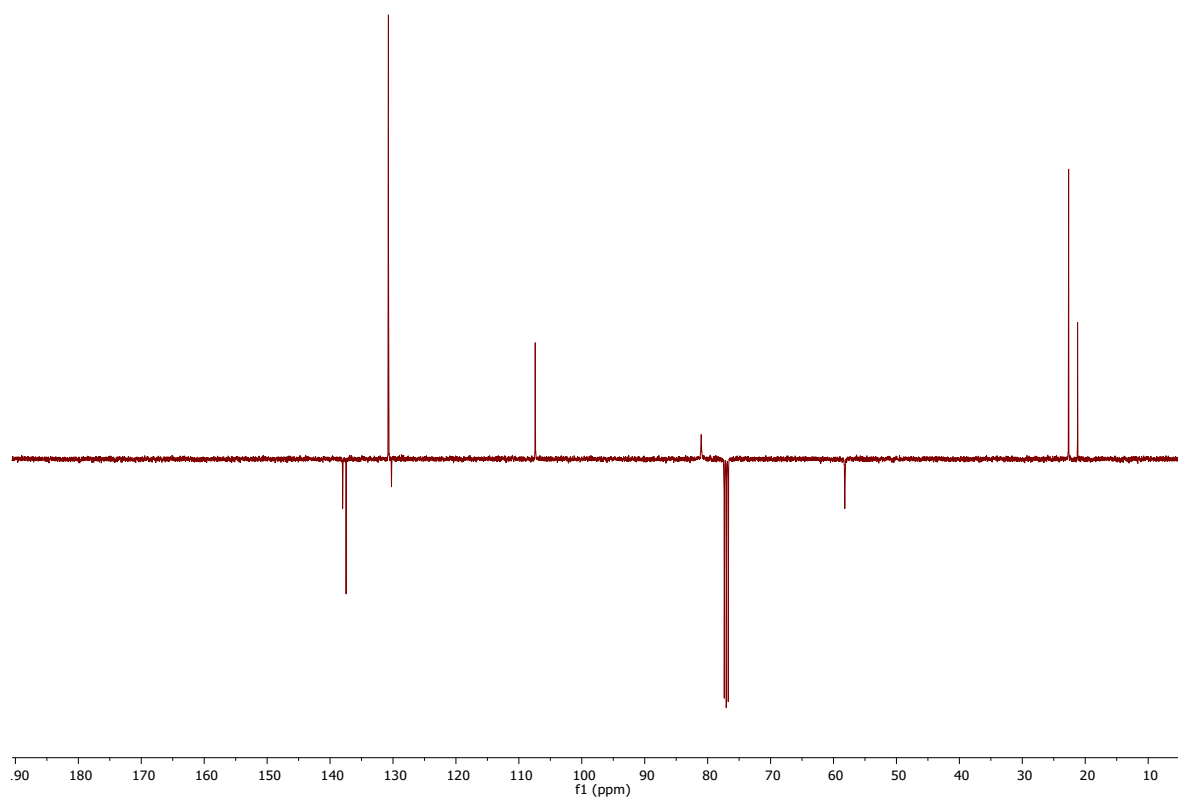

$^1\text{H}$  NMR (300 MHz,  $\text{CDCl}_3$ ) of **8**

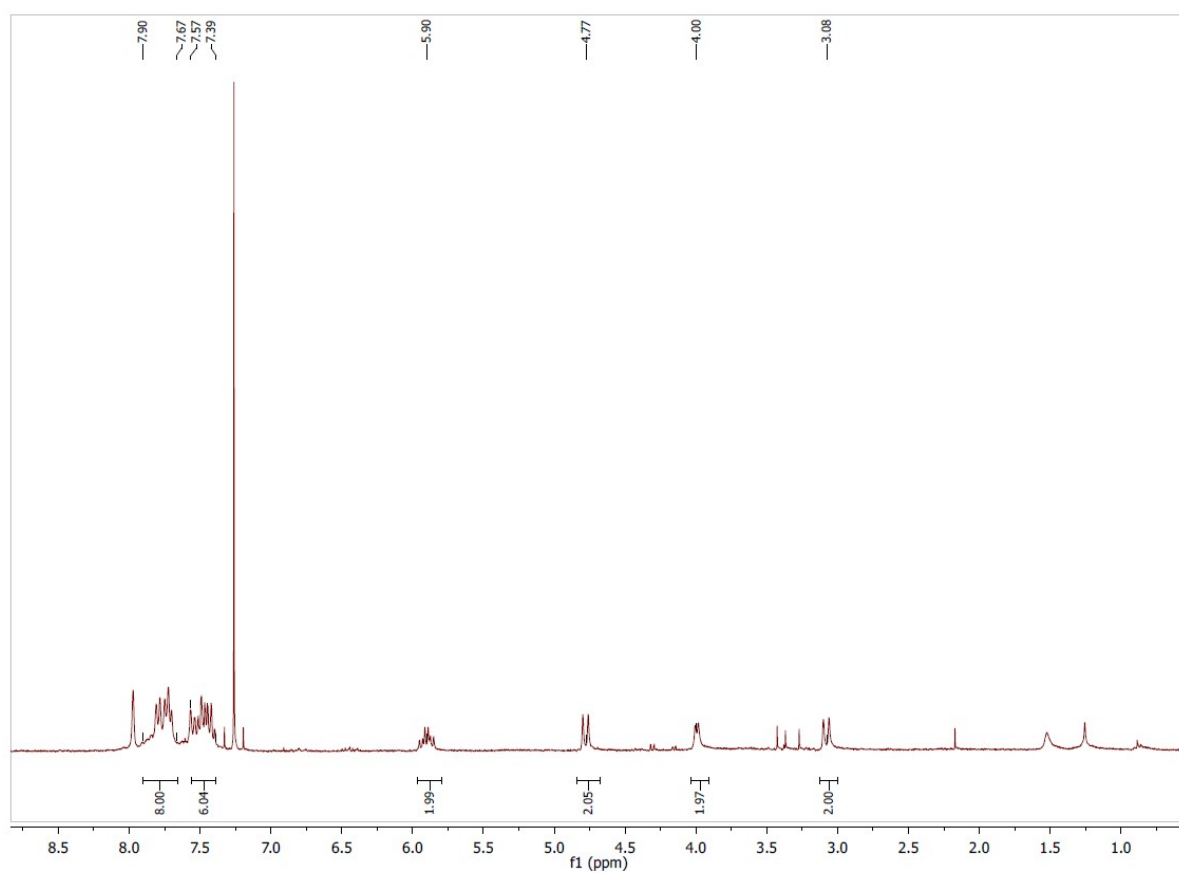

$^{13}\text{C}$  NMR (400 MHz,  $\text{DMSO-d}_6$ ) of **8**

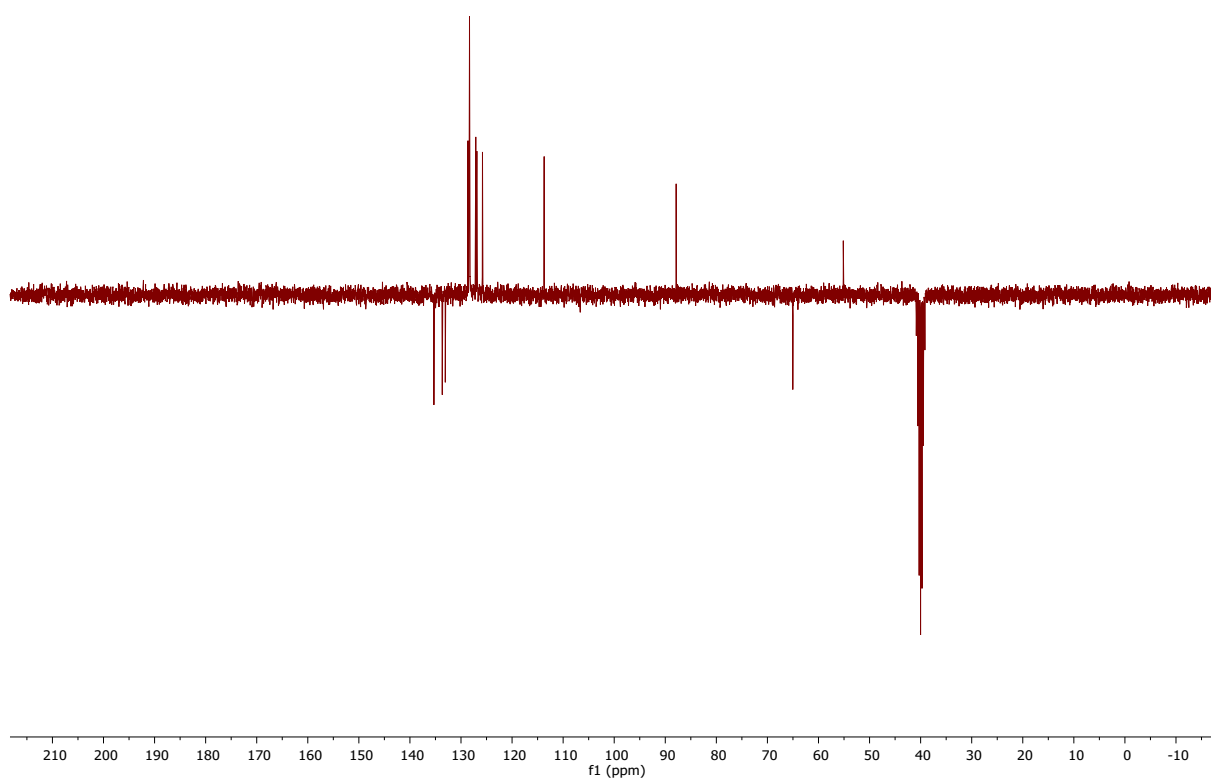

<sup>1</sup>H NMR (300 MHz, CDCl<sub>3</sub>) of IPr-1

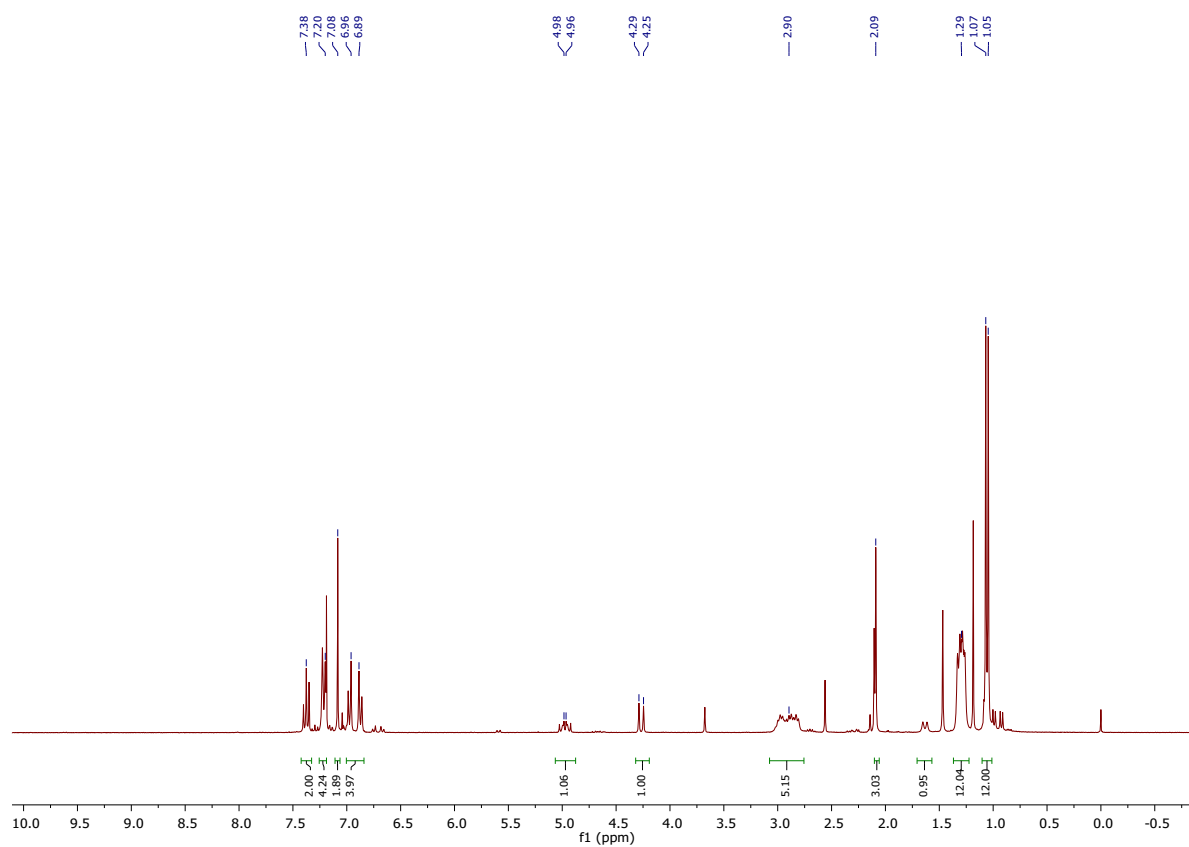

<sup>13</sup>C NMR (300 MHz, CDCl<sub>3</sub>) of IPr-1

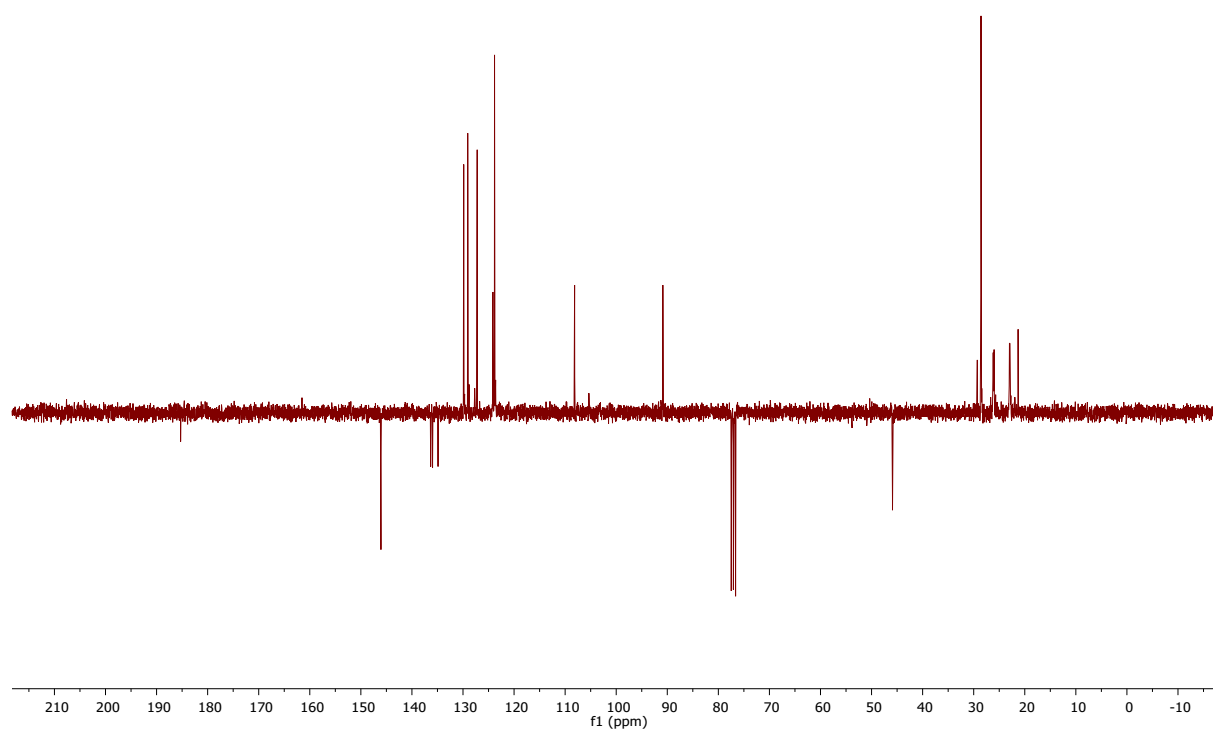

<sup>1</sup>H NMR (300 MHz, CDCl<sub>3</sub>) of IPr-2

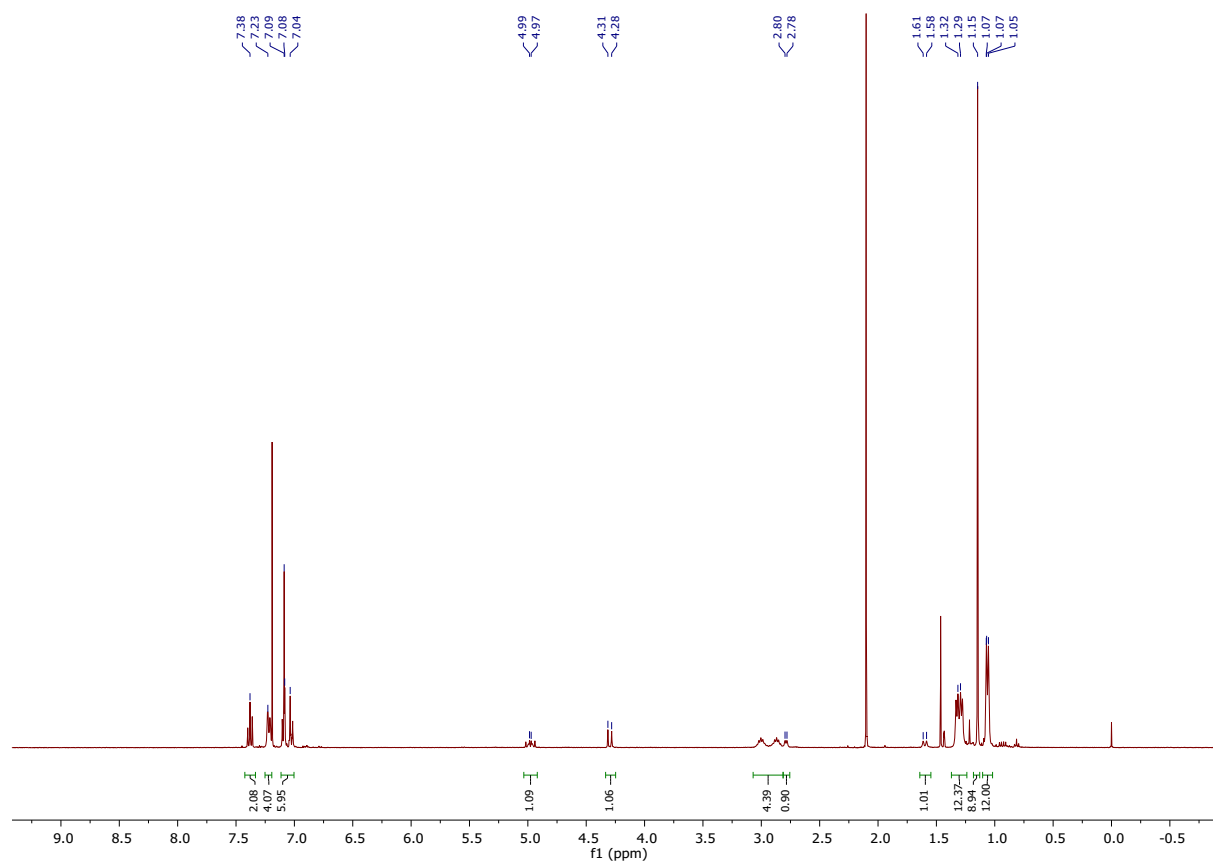

<sup>13</sup>C NMR (400 MHz, CDCl<sub>3</sub>) of IPr-2

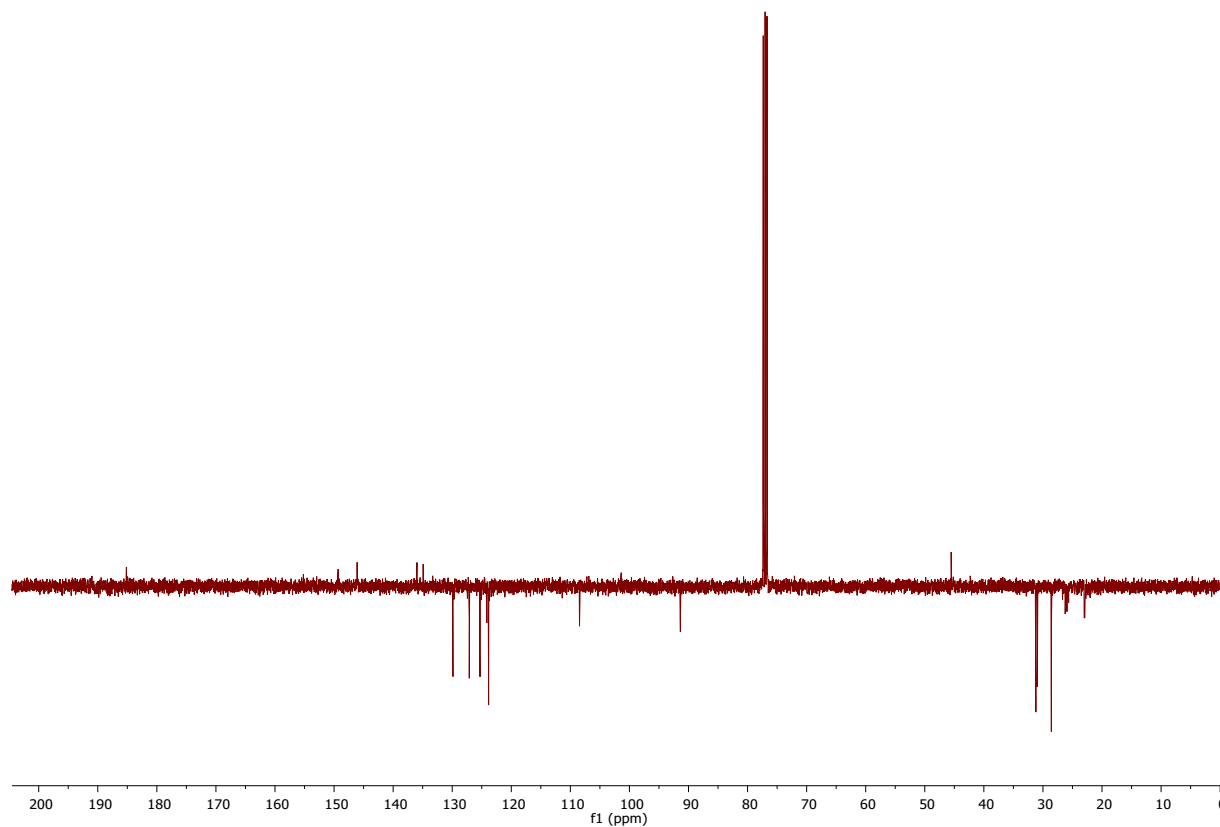

<sup>1</sup>H NMR (300 MHz, CDCl<sub>3</sub>) of IPr-3

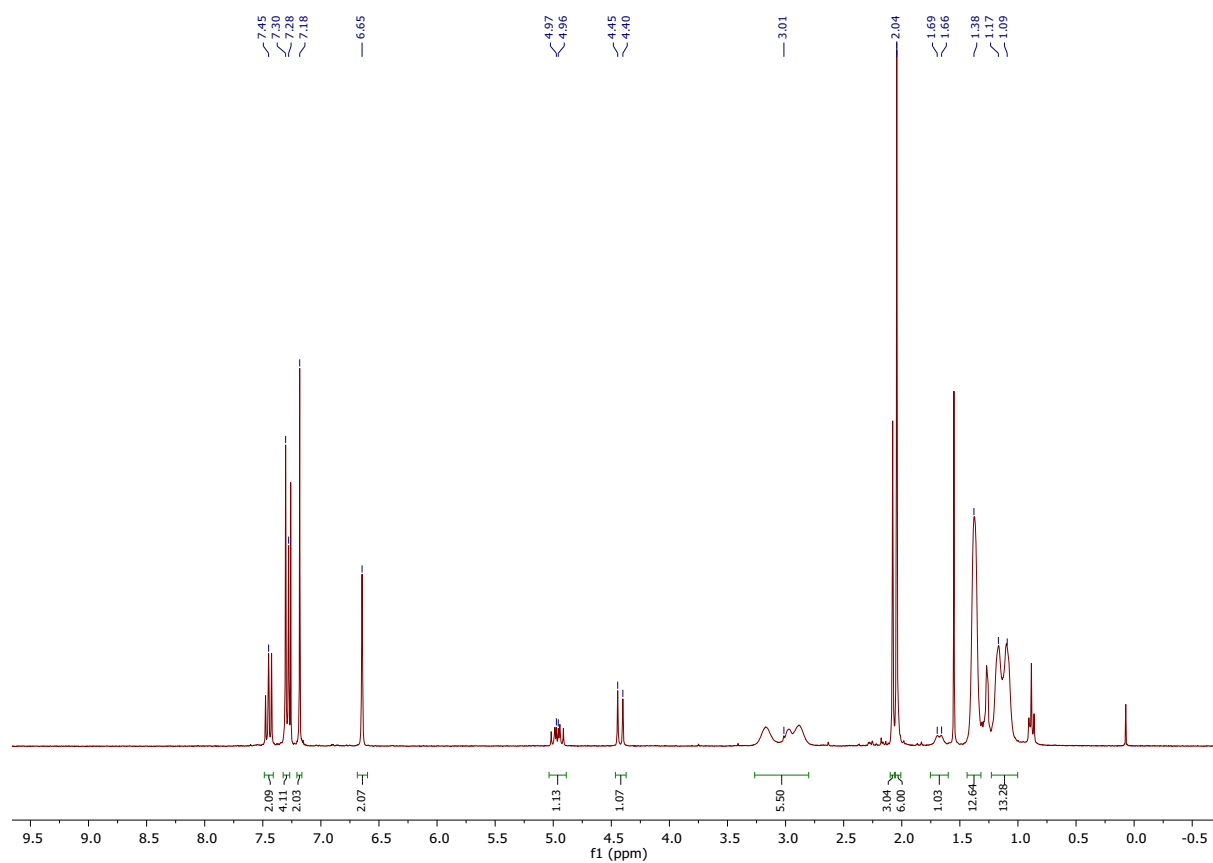

<sup>13</sup>C NMR (300 MHz, CDCl<sub>3</sub>) of IPr-3

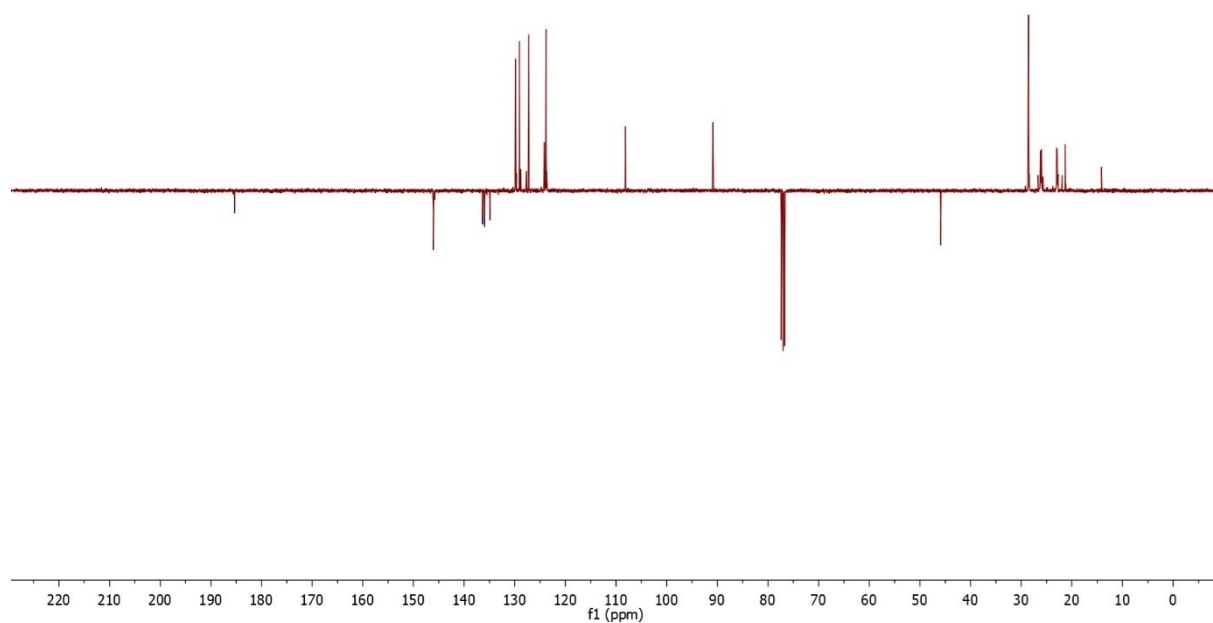

<sup>1</sup>H NMR (300 MHz, CDCl<sub>3</sub>) of IPr-4

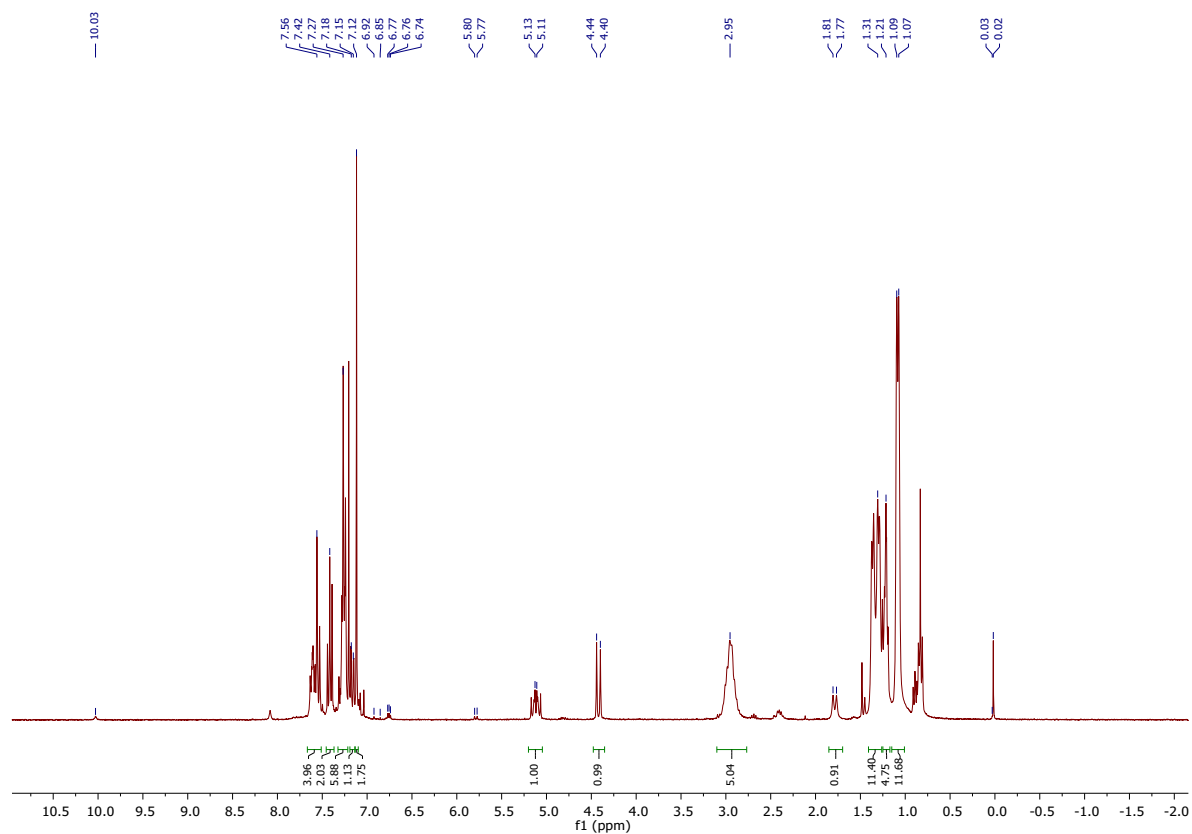

<sup>13</sup>C NMR 4300 MHz, CDCl<sub>3</sub>) of IPr-4

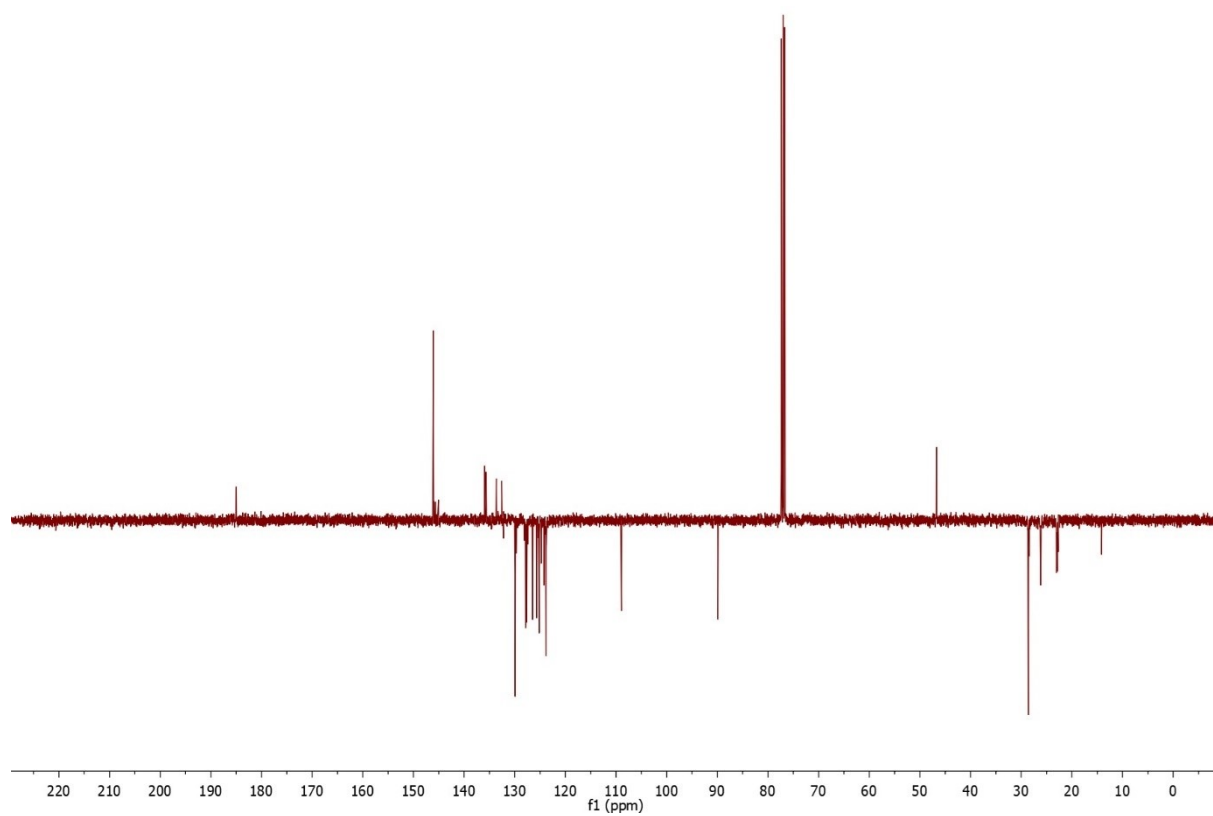

<sup>1</sup>H NMR (300 MHz, CDCl<sub>3</sub>) of IPr\*-1

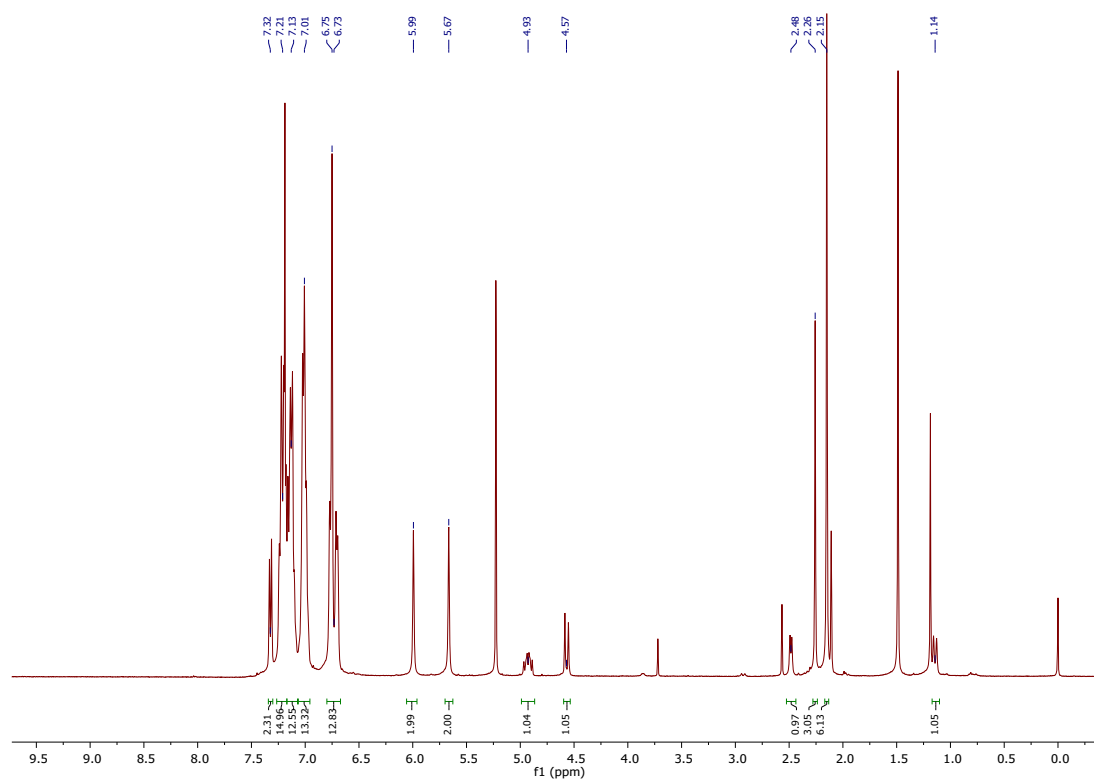

<sup>13</sup>C NMR (300 MHz, CDCl<sub>3</sub>) of IPr\*-1

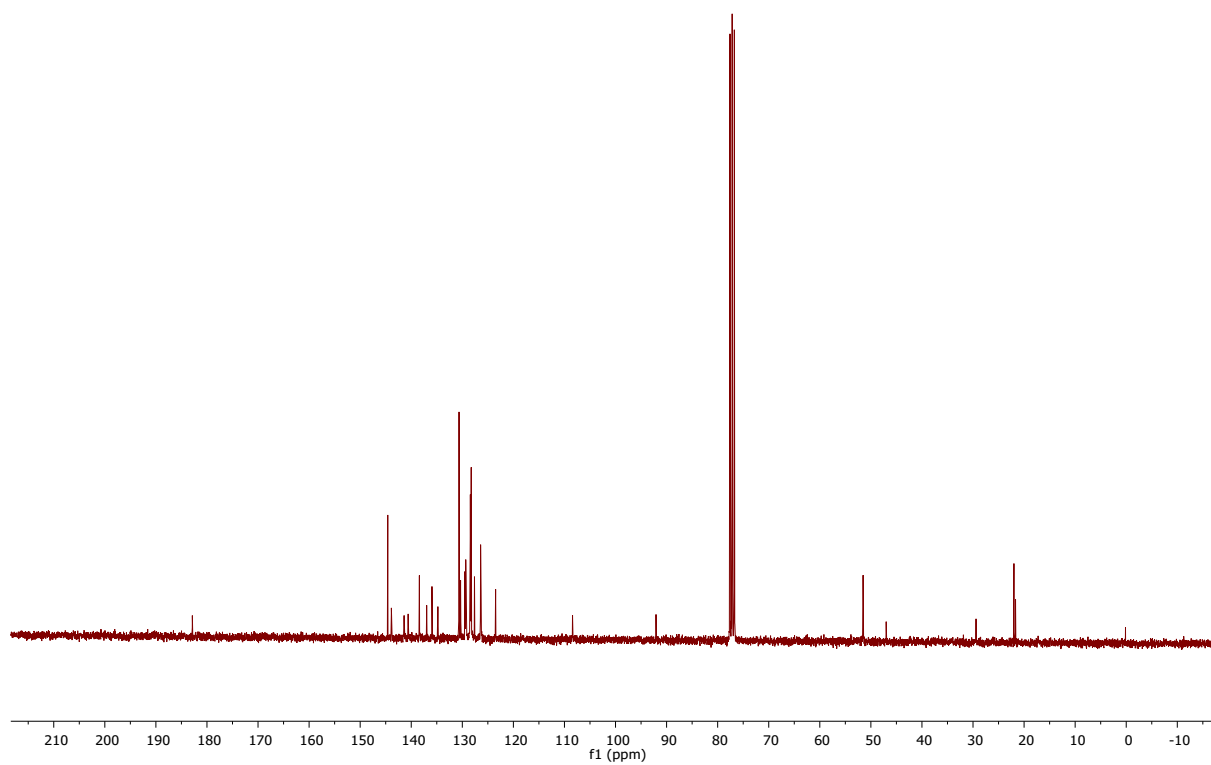



<sup>1</sup>H NMR (300 MHz, CDCl<sub>3</sub>) of IPr\*-2

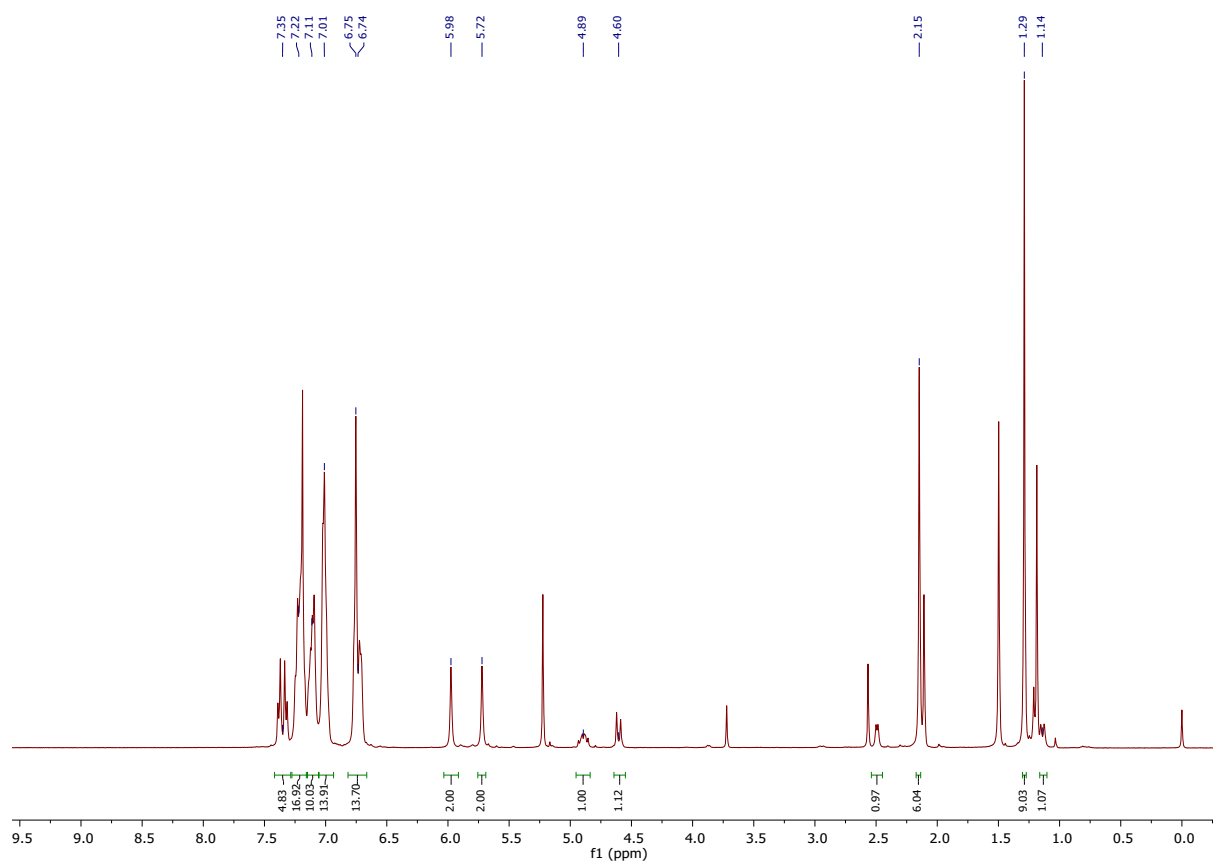

<sup>13</sup>C NMR (300 MHz, CDCl<sub>3</sub>) of IPr\*-2

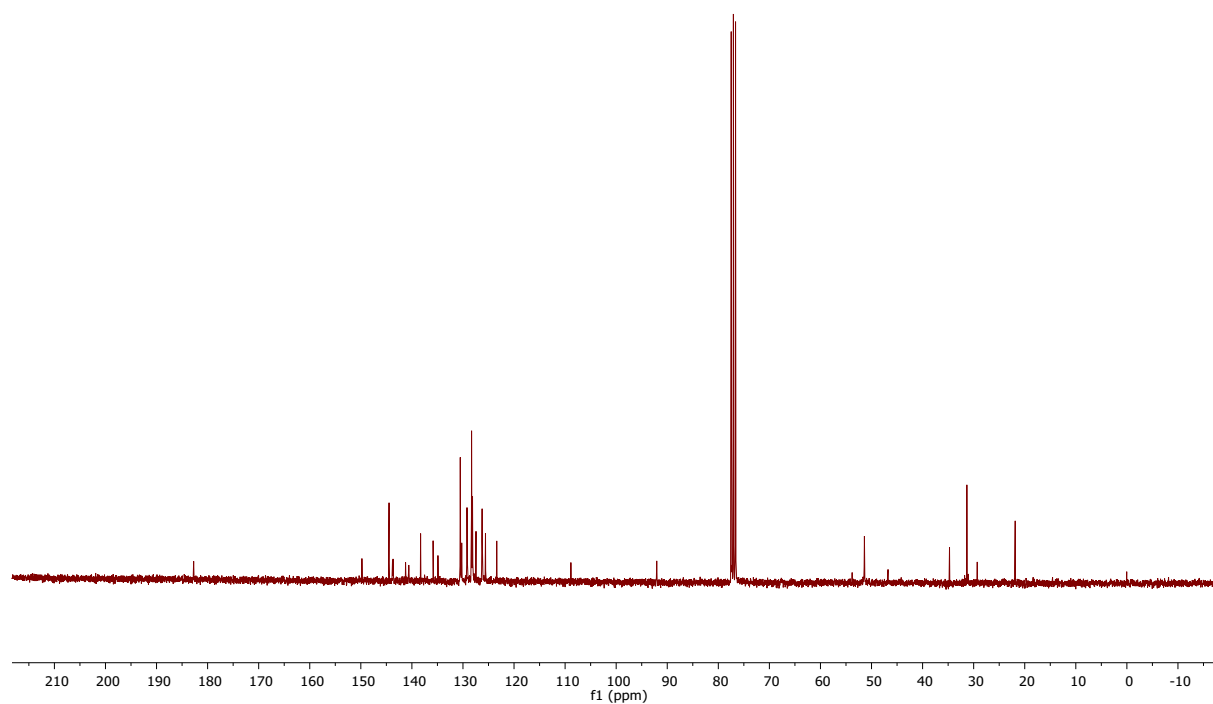

$^1\text{H}$  NMR (300 MHz,  $\text{CDCl}_3$ ) of **IPr\*-3**

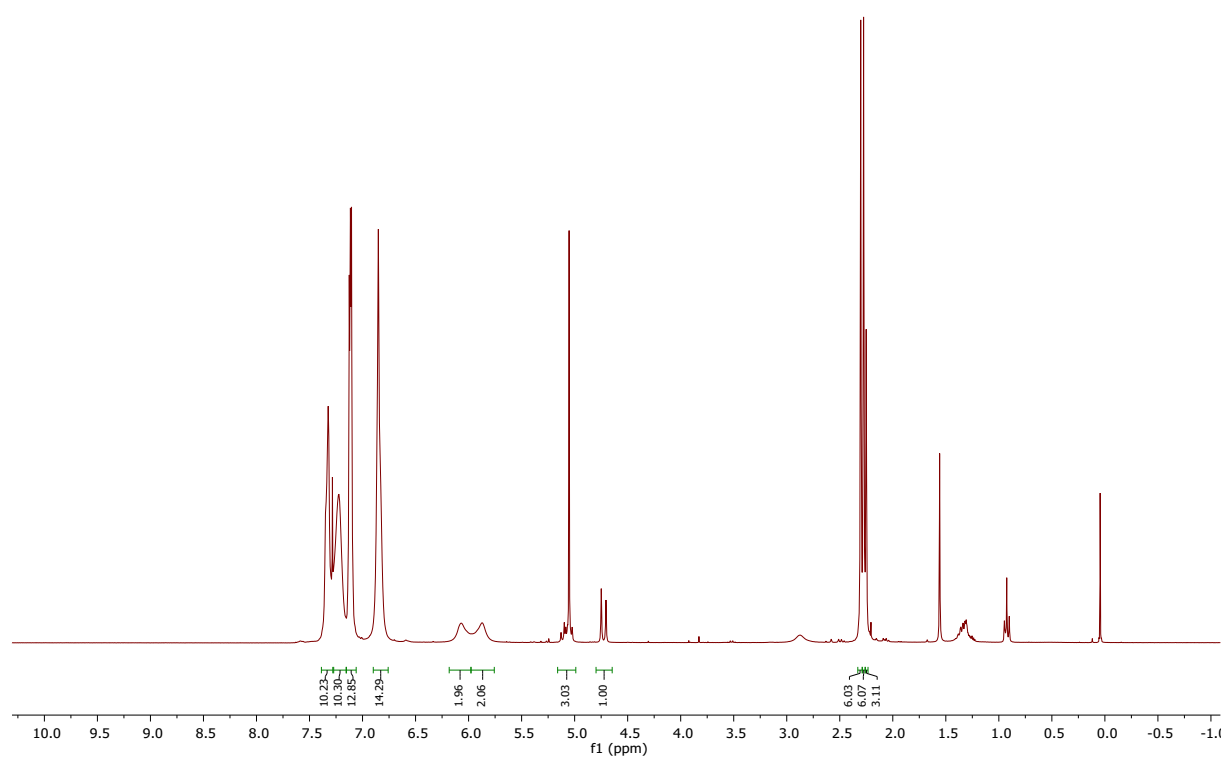

$^{13}\text{C}$  NMR (300 MHz,  $\text{CDCl}_3$ ) of **IPr\*-3**

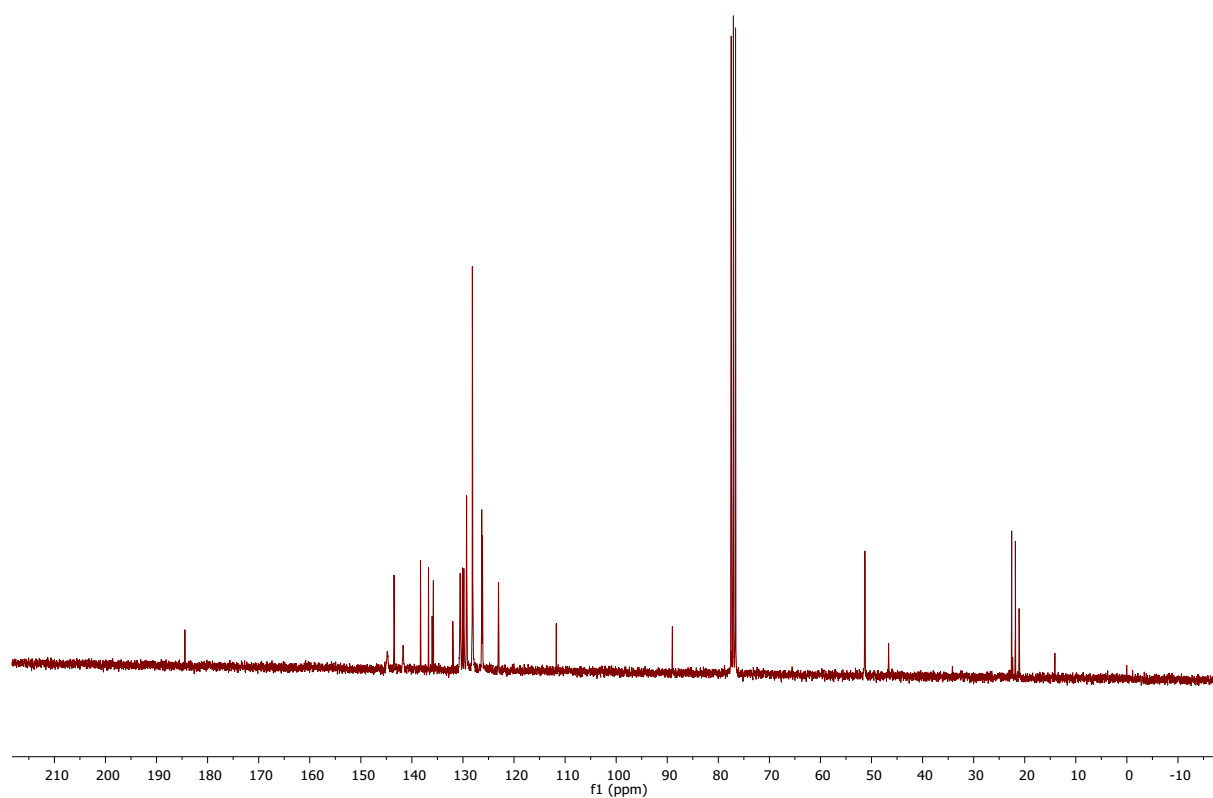

<sup>1</sup>H NMR (300 MHz, CDCl<sub>3</sub>) of IPr\*-4

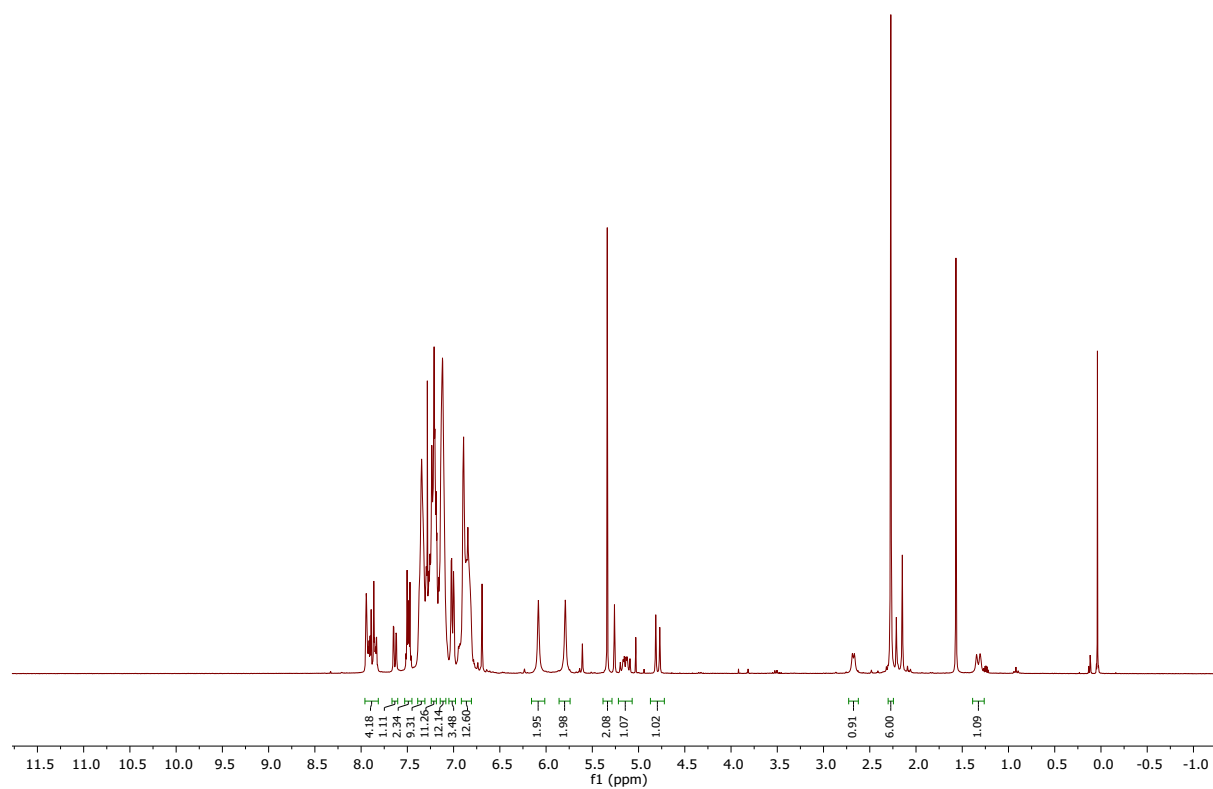

<sup>13</sup>C NMR (300 MHz, CDCl<sub>3</sub>) of IPr\*-4

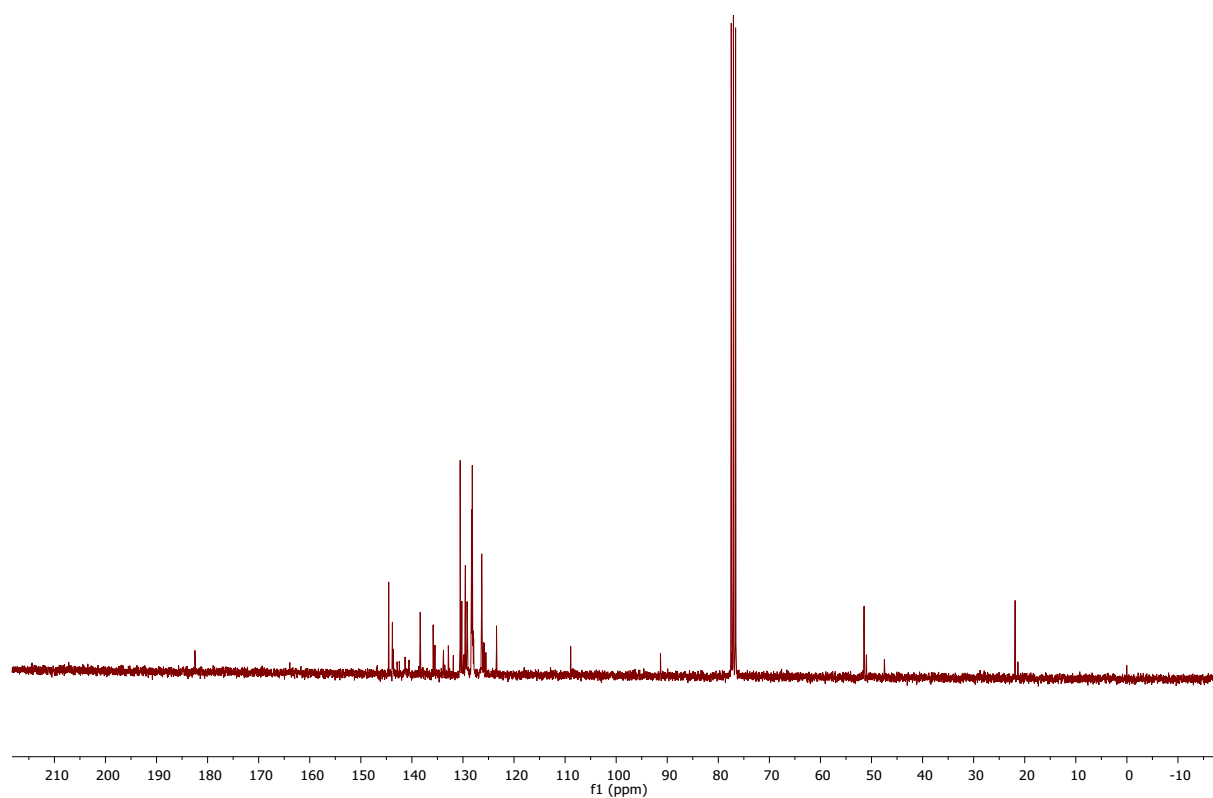

$^1\text{H}$  NMR (300 MHz,  $\text{CDCl}_3$ ) of **1a**

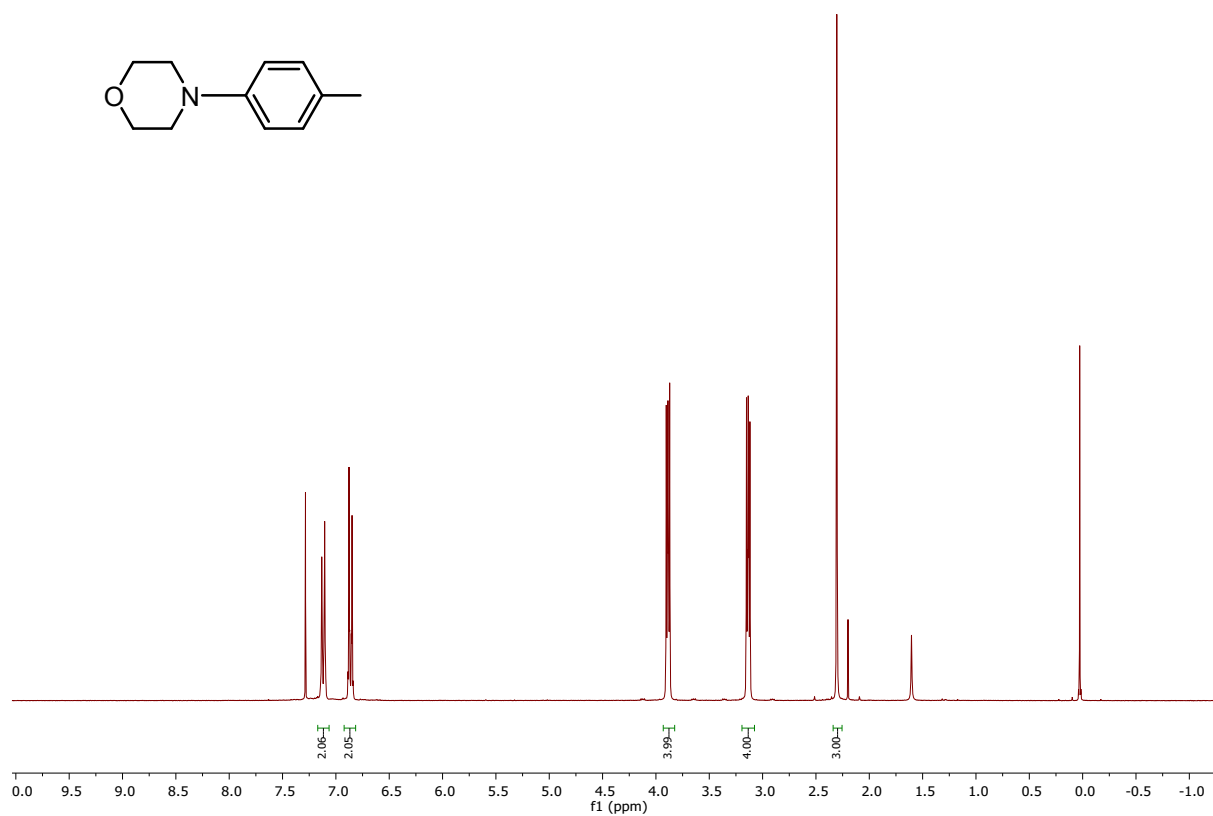

$^1\text{H}$  NMR (300 MHz,  $\text{CDCl}_3$ ) of **1b**

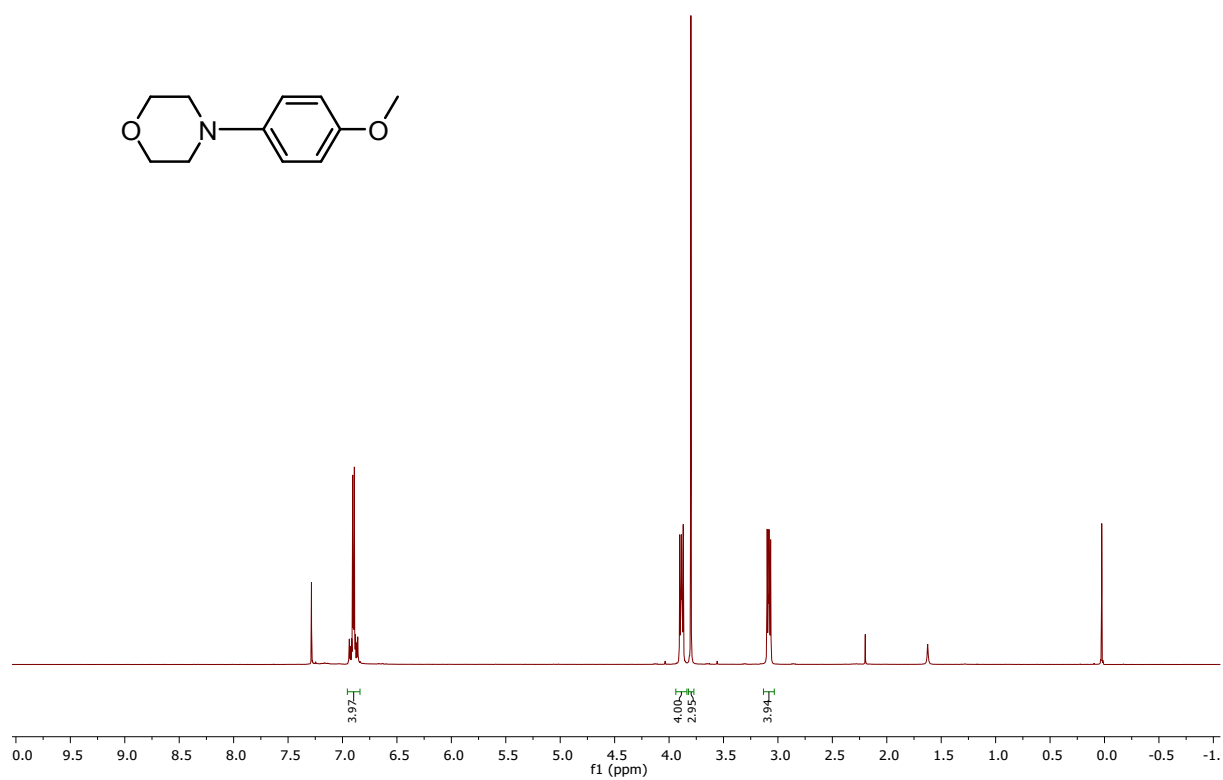

$^1\text{H}$  NMR (300 MHz,  $\text{CDCl}_3$ ) of **1c**

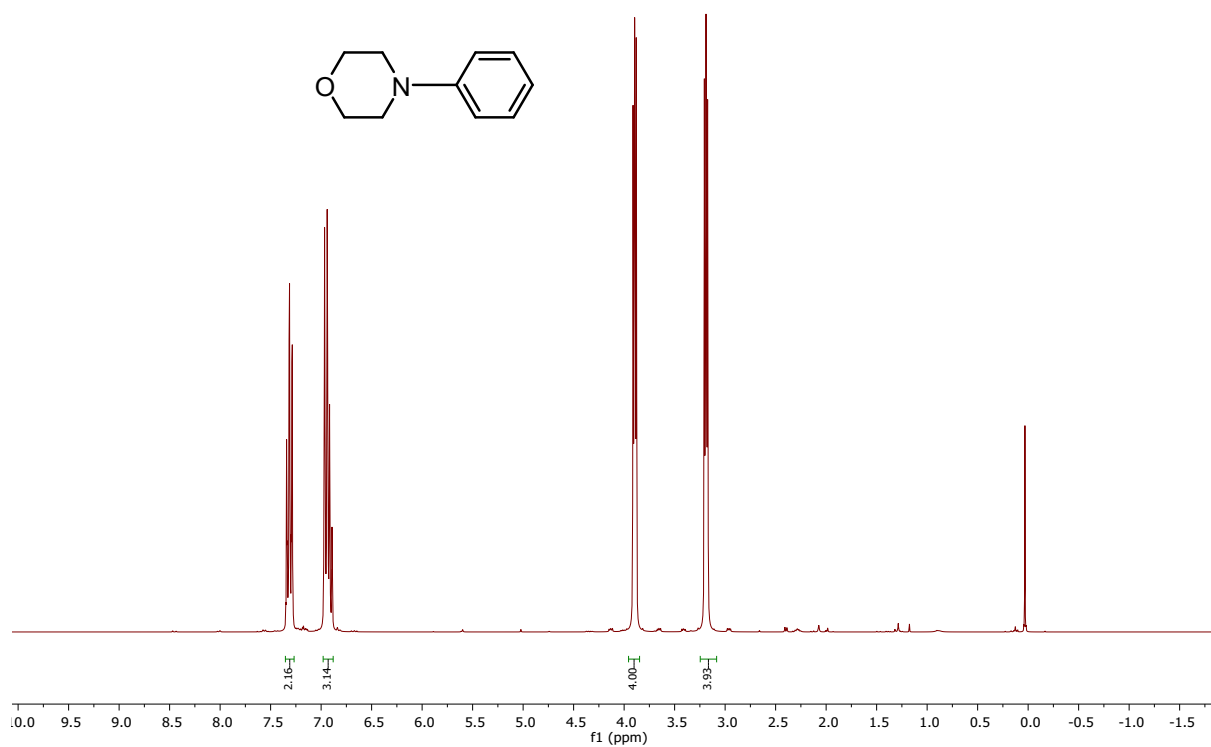

$^1\text{H}$  NMR (300 MHz,  $\text{CDCl}_3$ ) of **1d**

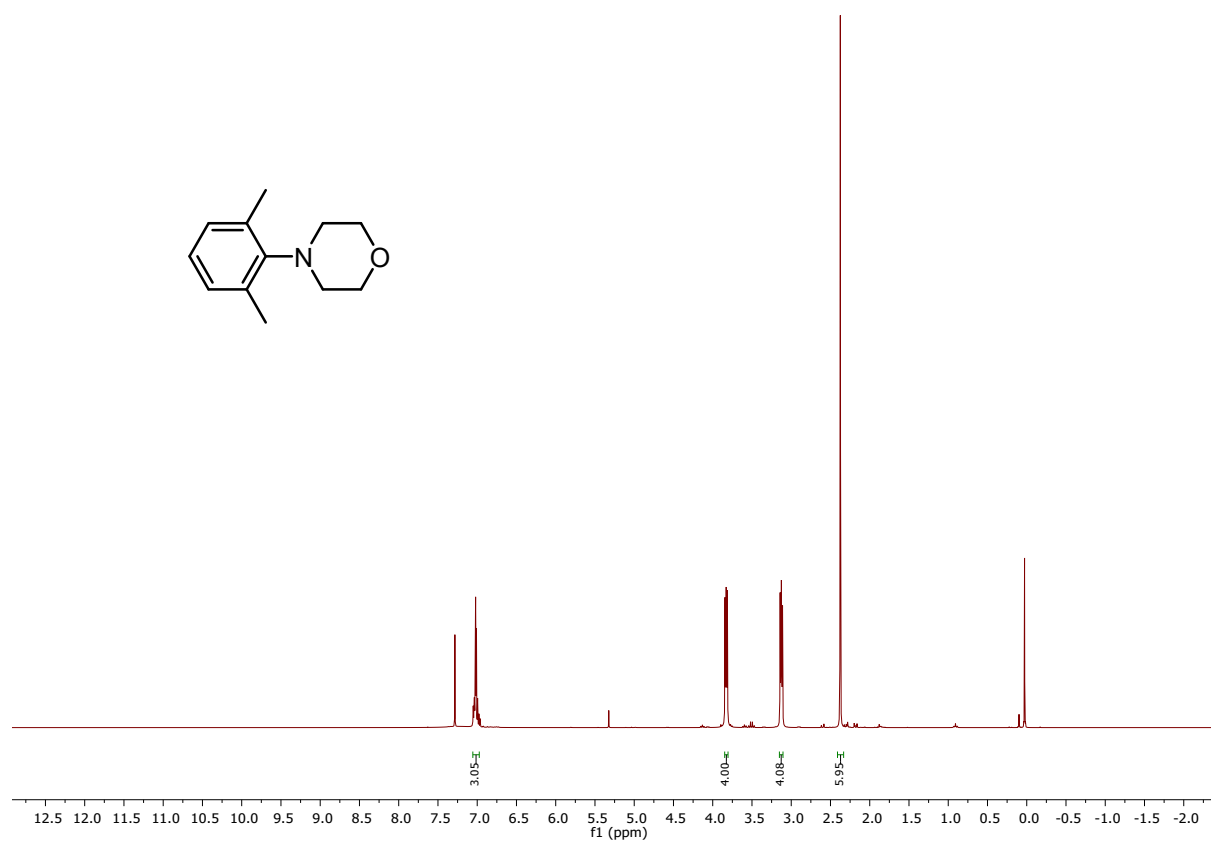

$^1\text{H}$  NMR (300 MHz,  $\text{CDCl}_3$ ) of **1e**

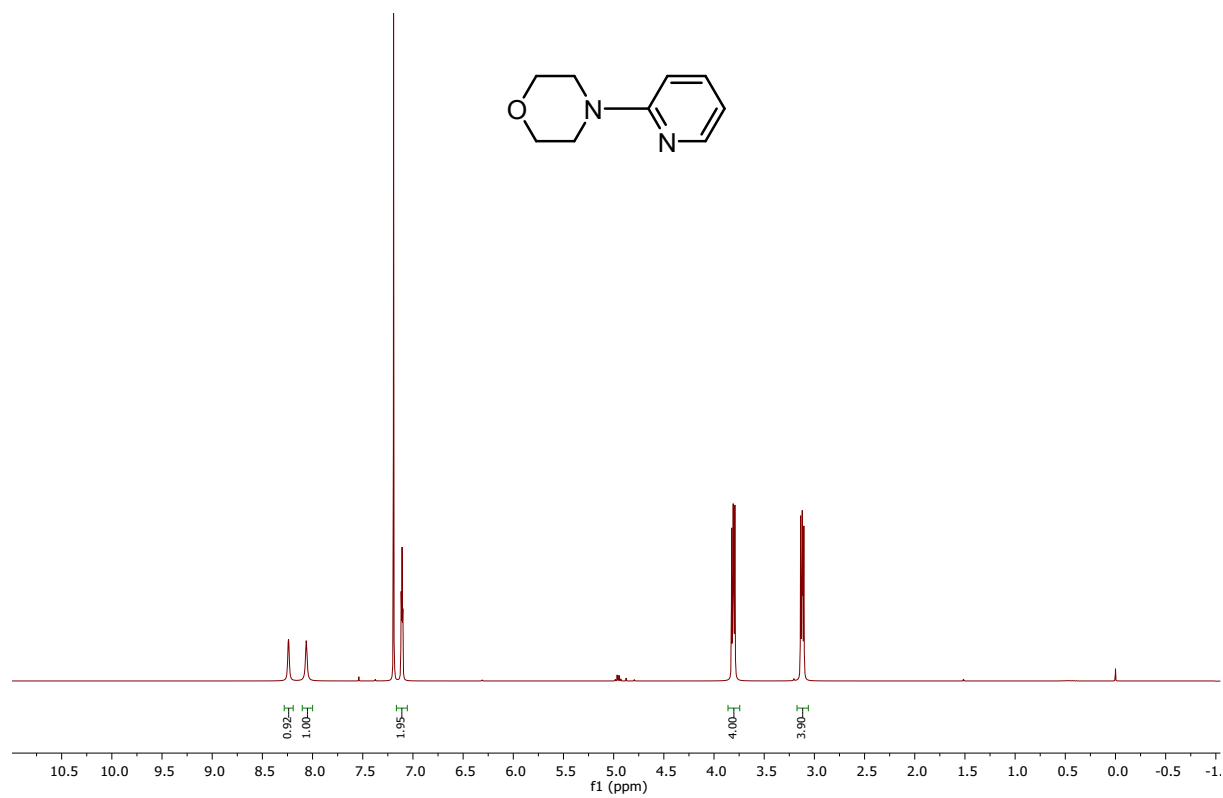

$^1\text{H}$  NMR (300 MHz,  $\text{CDCl}_3$ ) of **1f**

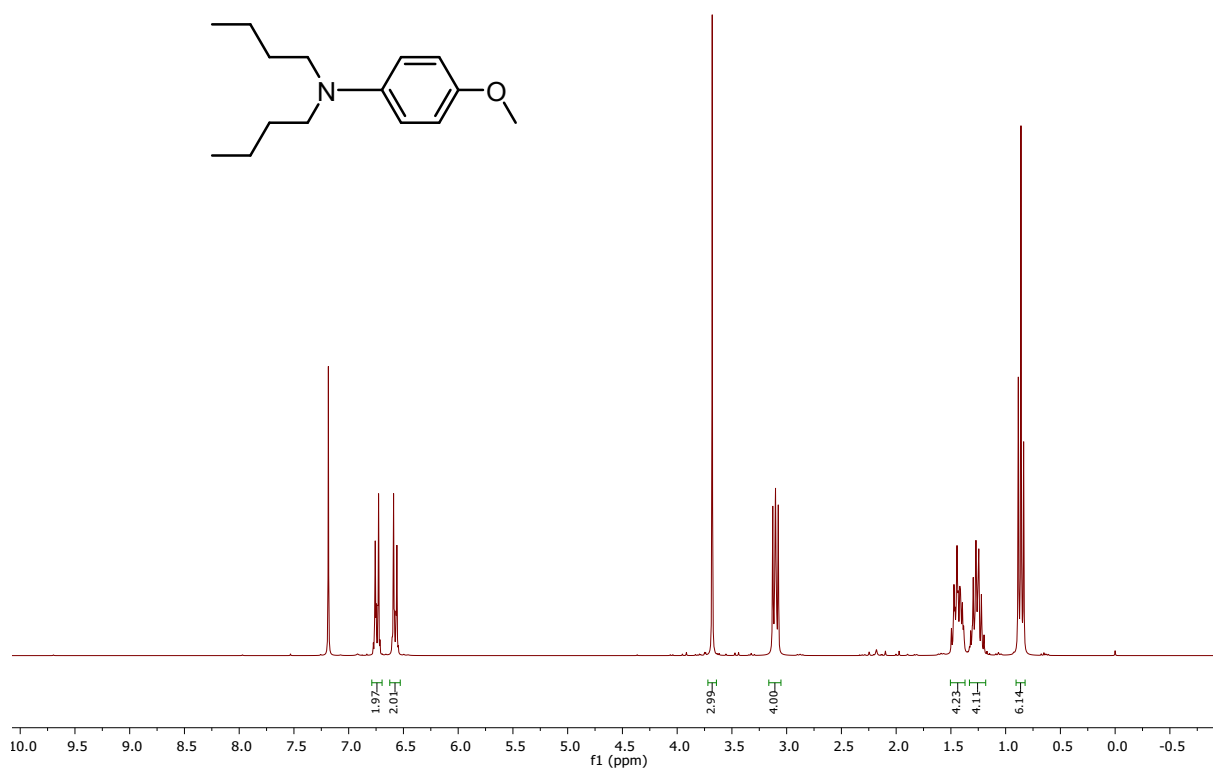

$^1\text{H}$  NMR (300 MHz,  $\text{CDCl}_3$ ) of **1g**

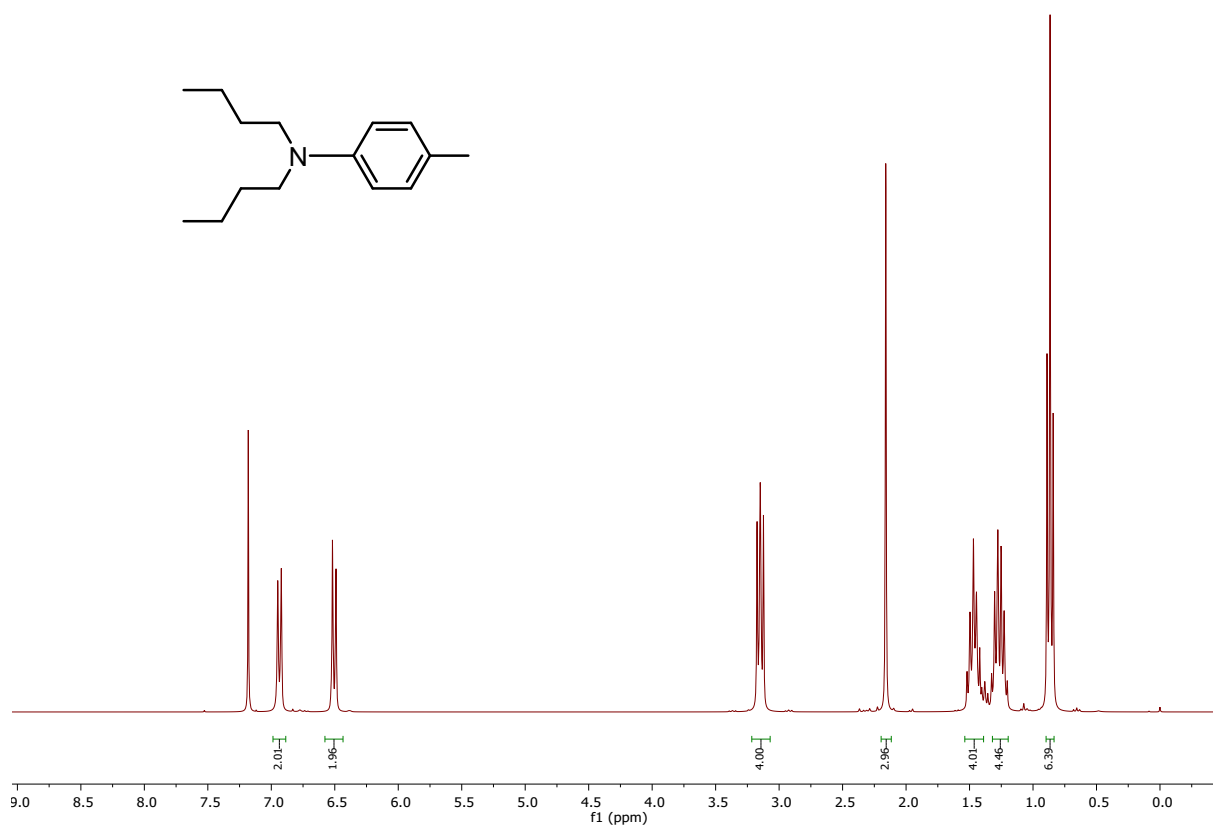

$^1\text{H}$  NMR (300 MHz,  $\text{CDCl}_3$ ) of **1h**

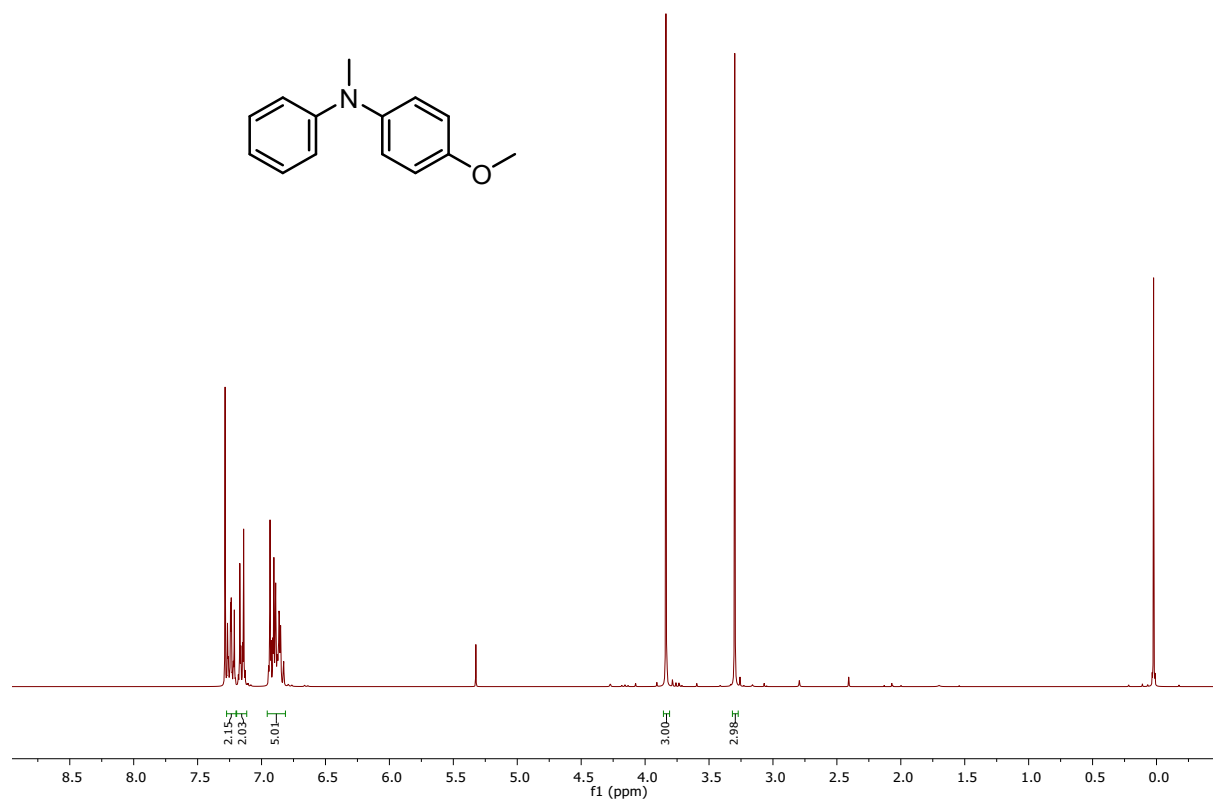

$^1\text{H}$  NMR (300 MHz,  $\text{CDCl}_3$ ) of **1i**

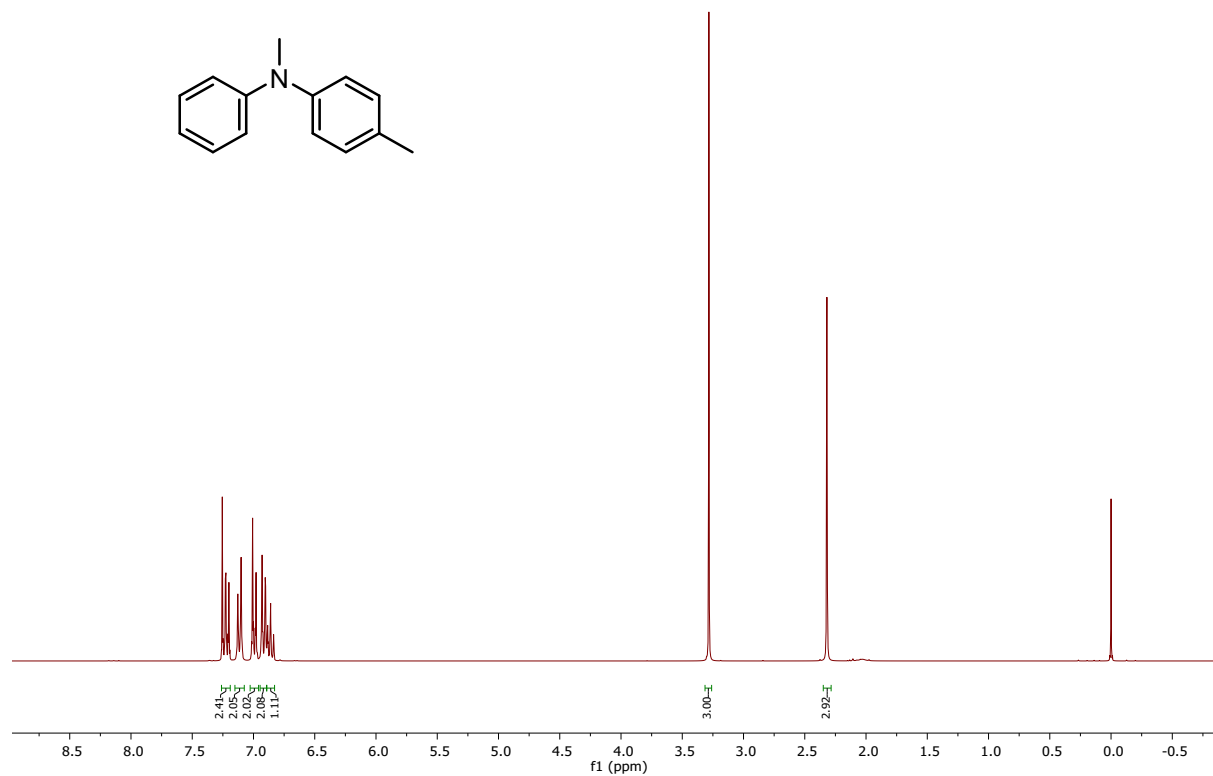

$^1\text{H}$  NMR (300 MHz,  $\text{CDCl}_3$ ) of **1j**

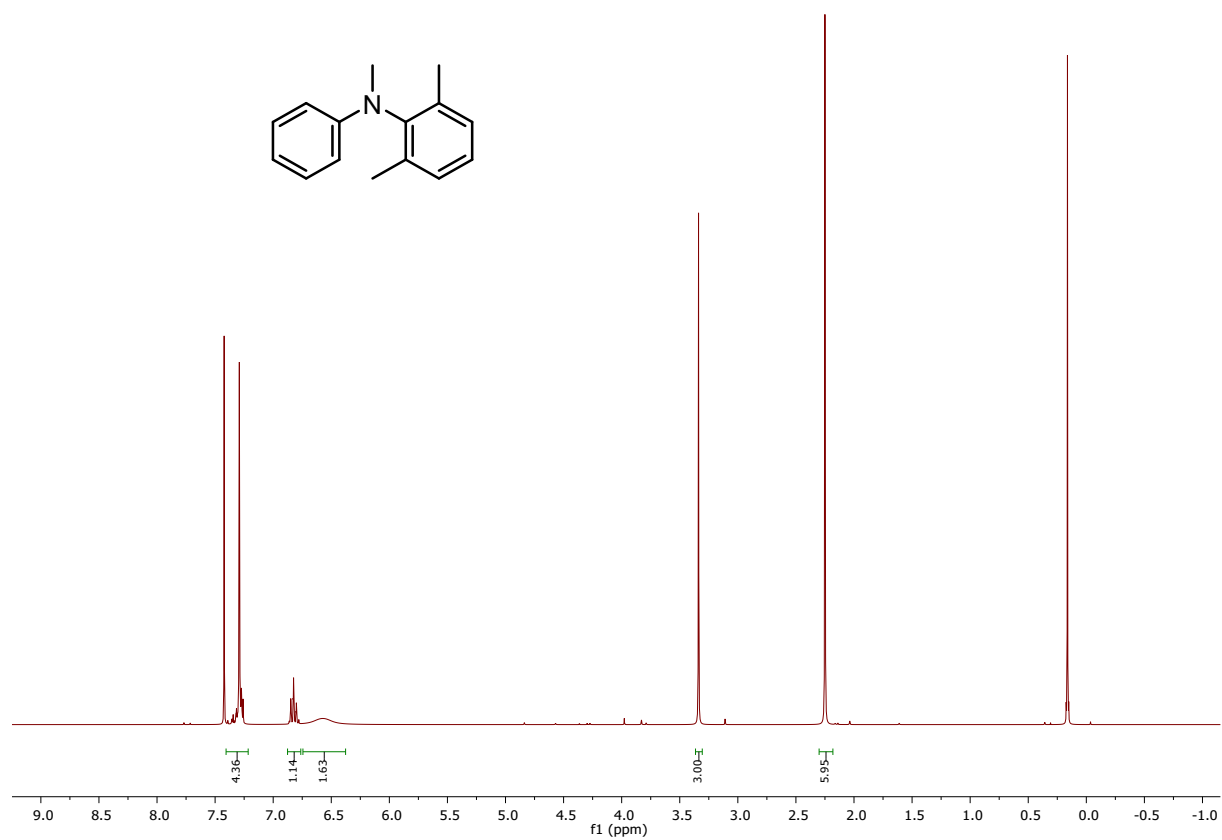



$^1\text{H}$  NMR (300 MHz,  $\text{CDCl}_3$ ) of **1k**

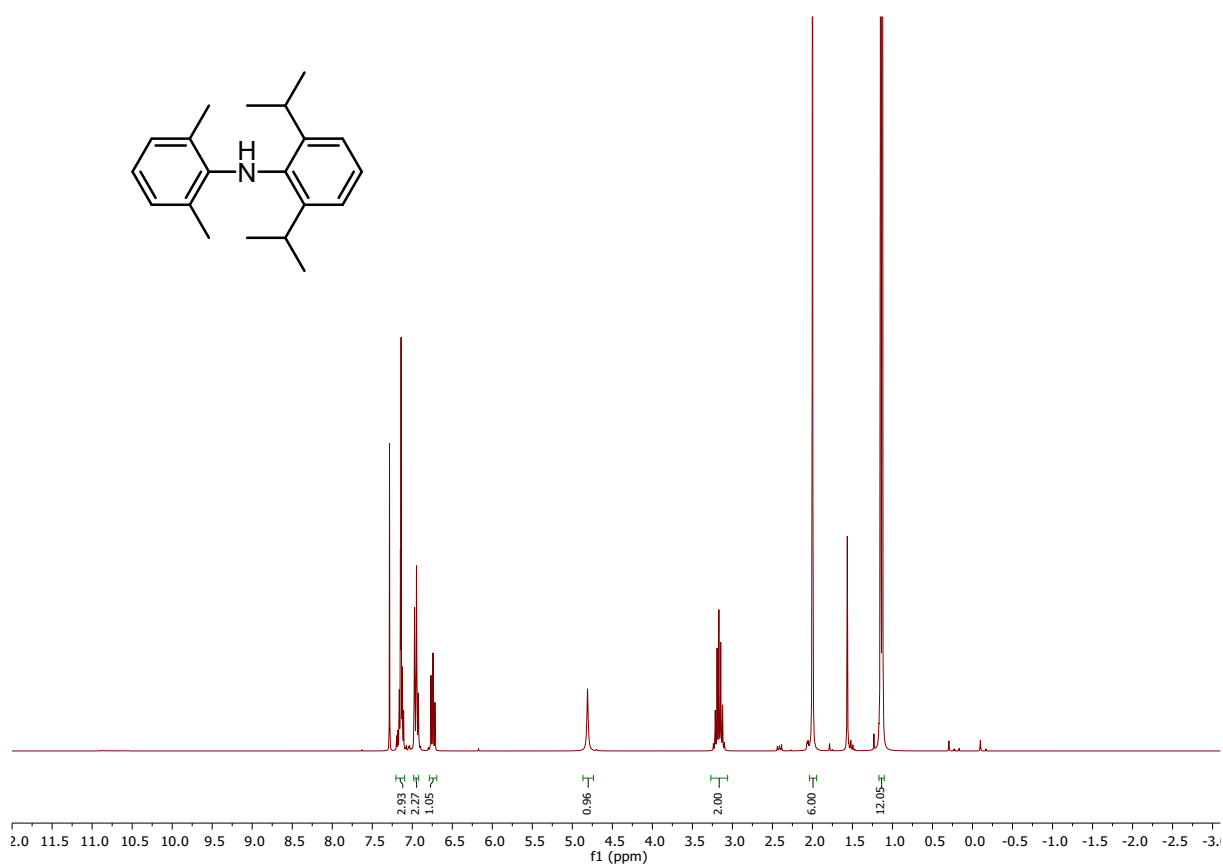

$^1\text{H}$  NMR (300 MHz,  $\text{CDCl}_3$ ) of **IPr-1 Pd(I)** dimer formation

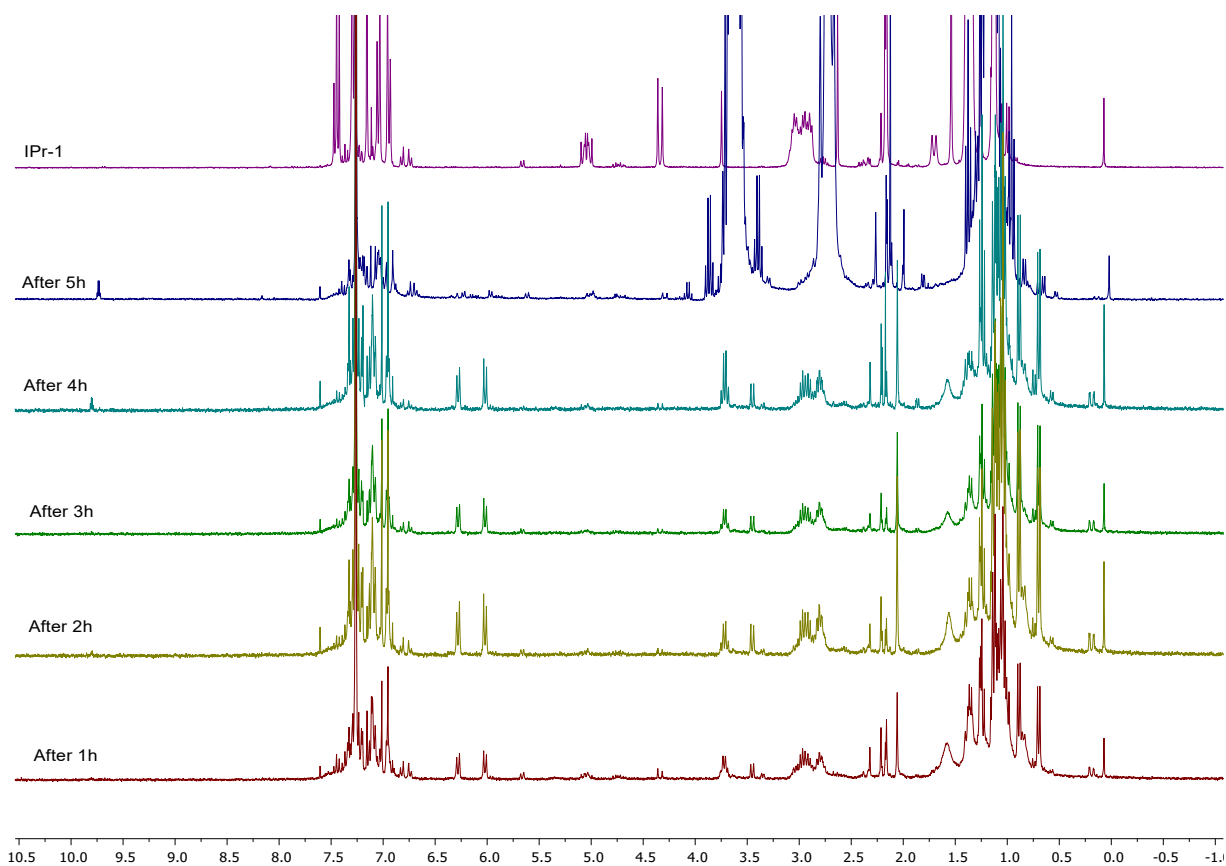

$^1\text{H}$  NMR (300 MHz,  $\text{CDCl}_3$ ) of IPr-2 Pd(I) dimer formation

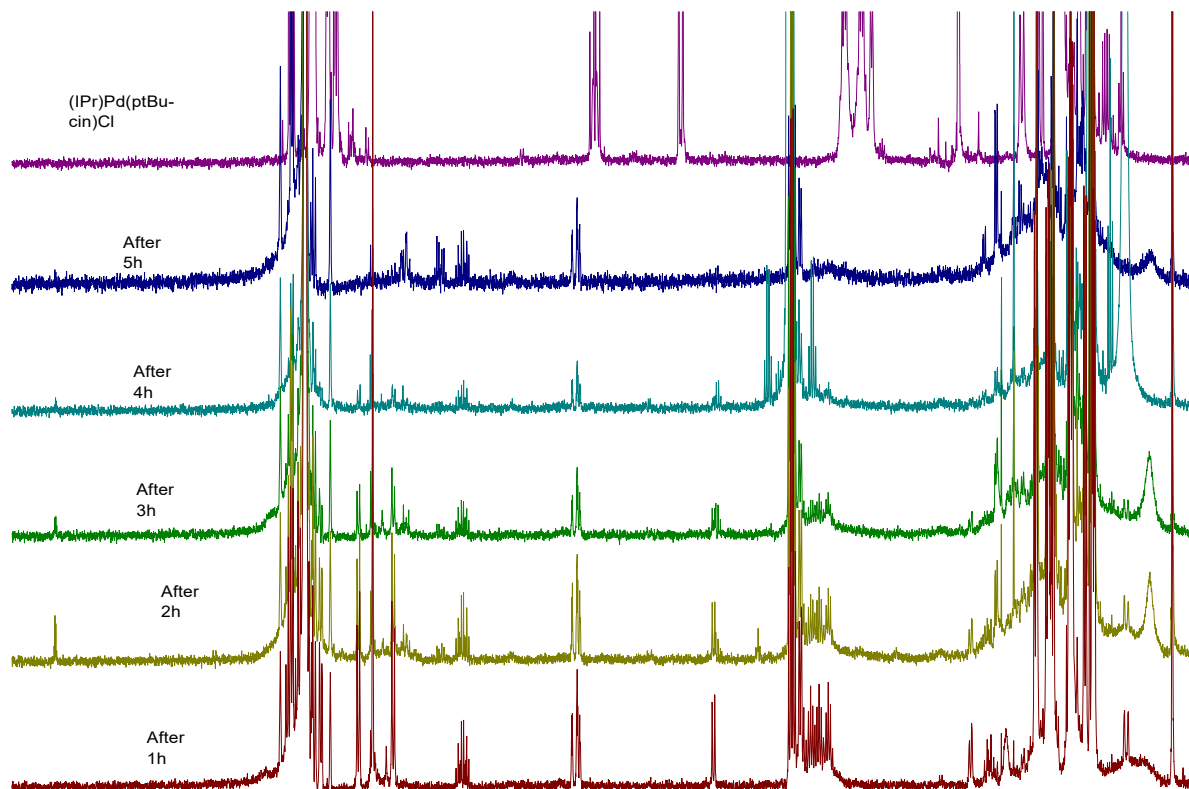

$^1\text{H}$  NMR (300 MHz,  $\text{CDCl}_3$ ) of IPr-3 Pd(I) dimer formation

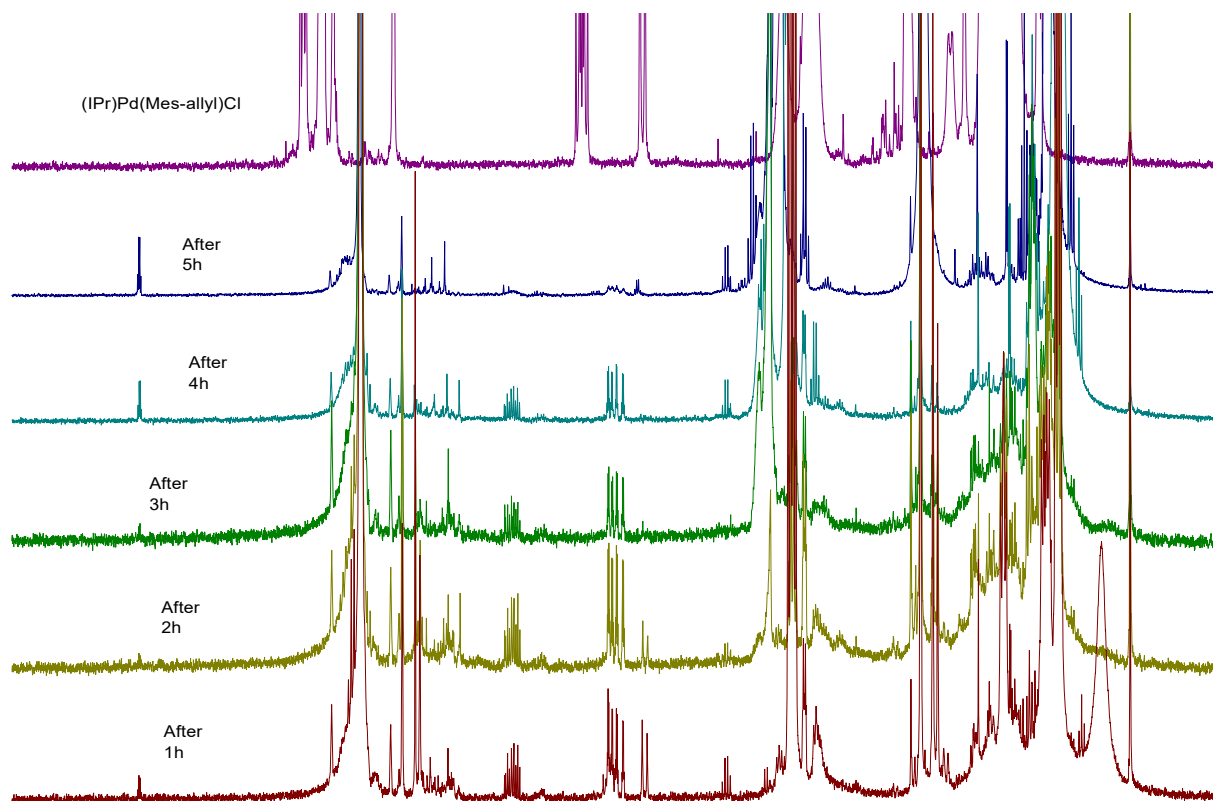

<sup>1</sup>H NMR (300 MHz, CDCl<sub>3</sub>) of IPr-4 Pd(I) dimer formation

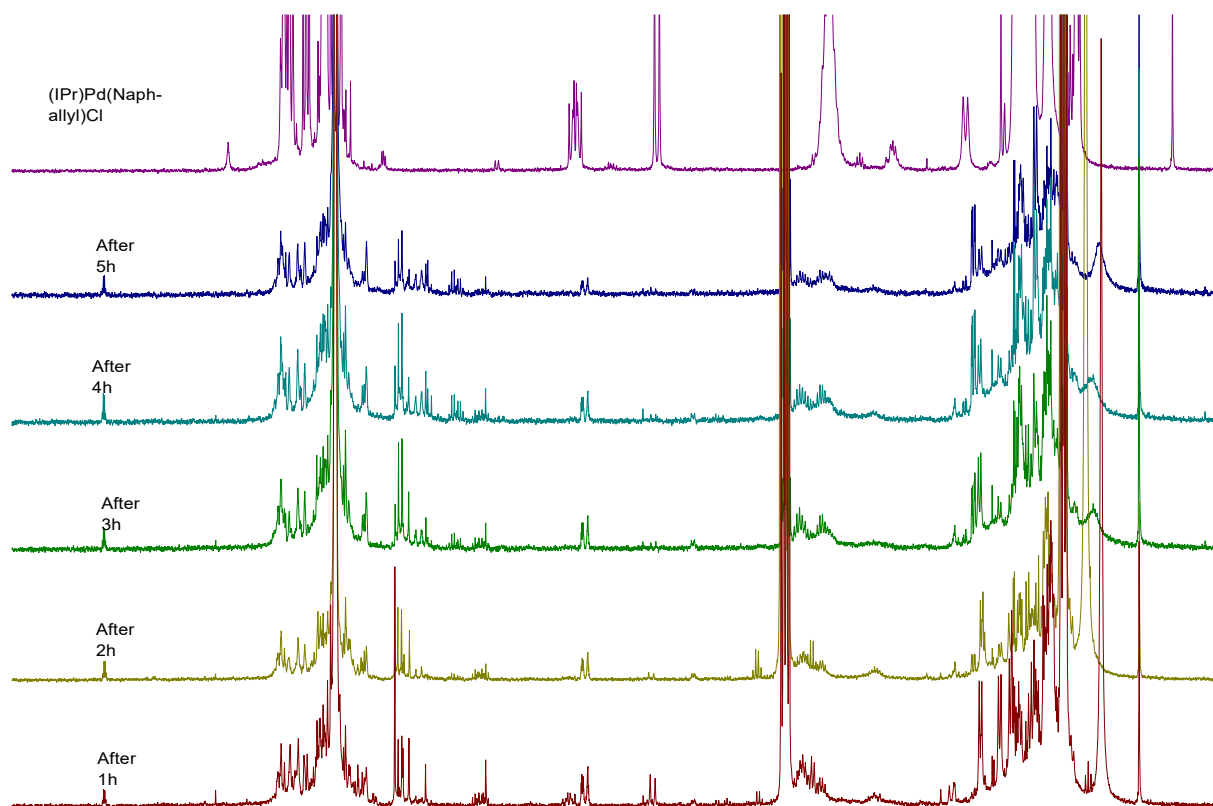

## References

- 1 W. Lölsberg, S. Ye and H.-G. Schmalz, *Advanced Synthesis & Catalysis*, 2010, **352**, 2023–2031.
- 2 N. W. J. Ang, J. C. A. Oliveira and L. Ackermann, *Angewandte Chemie International Edition*, 2020, **59**, 12842–12847.
- 3 W.-F. Wang, J.-B. Peng, X. Qi, J. Ying and X.-F. Wu, *Chemistry – A European Journal*, 2019, **25**, 3521–3524.
- 4 C. I. Jette, Z. J. Tong, R. G. Hadt and B. M. Stoltz, *Angewandte Chemie International Edition*, 2020, **59**, 2033–2038.
- 5 M. Kim, T. Shin, A. Lee and H. Kim, *Organometallics*, 2018, **37**, 3253–3258.
- 6 N. Marion, O. Navarro, J. Mei, E. D. Stevens, N. M. Scott and S. P. Nolan, *J. Am. Chem. Soc.*, 2006, **128**, 4101–4111.
- 7 W.-J. Xiong, L. Li, J.-T. Li, S.-Q. Zhang, J.-L. Tang and T. Zhou, *Tetrahedron Letters*, 2023, **127**, 154684.
- 8 S. Meiries, A. Chartoire, A. M. Z. Slawin and S. P. Nolan, *Organometallics*, 2012, **31**, 3402–3409.
- 9 S. Meiries, K. Speck, D. B. Cordes, A. M. Z. Slawin and S. P. Nolan, *Organometallics*, 2013, **32**, 330–339.
- 10 Y. Liu, V. A. Voloshkin, T. Scattolin, L. Cavallo, B. Dereli, C. S. J. Cazin and S. P. Nolan, *Dalton Trans.*, 2021, **50**, 5420–5427.
